# Supplementary material
Source: Research Square preprint supplement (doi:10.21203/rs.3.rs-9121075/v1)
Supplement: Supplementary file 1 [file 04392c108a85a3e8c129c8da.xlsx]

## Sheet: Readme | Introduction
Article: Extending EXIOBASE through explicit solar PV supply-chain modelling: implications for the EU Net Zero Industry Act
Supplementary Material – Life-Cycle inventories, data and scenario assumptions
This Excel file provides the data and key assumptions used in the hybrid multiregional input–output life-cycle model developed for the analysis of the photovoltaic supply chain.
The material is organised into thematic sections to support transparency and reproducibility:
1) Inventories
	Process-based life-cycle inventories (LCIs) for the main PV supply-chain stages, with regional differentiation where relevant:
	CN	China
	EU	European Union (27)
	US	United states
	APAC	Asia-Pacific regions
	For all other regions, inventories are assumed to be equivalent to those listed above, according to the regional mapping reported in Inventories | Master
	N.B: Regionalization (i.e. share of domestic vs imported use) of inputs indicated as "GLOBAL" under "DB Region" columns of each inventory, will mimick the regionalization of the corresponding DB Item in the original EXIOBASE database
	Sheet	Description
	Inventories | Master	Summary of added activities and their commodity output, including functional units and associated LCI sheets.
	Inventories | EOL landfill	End-of-life Inventory for decommissioning, transport and disposal of PV systems.
	Inventories | PV use	Life-cycle inventory for PV plant installation, operation and maintenance, including the construction of electrical equipment in China. Fence construction is excluded, while transformers are assumed for each PV plant. Distinguished by region
	CN
	EU
	US
	APAC
	Inventories | PV prod	Life-cycle inventory for PV module assembly.
	CN
	EU
	US
	APAC
	Inventories | Cell prod	Life-cycle inventory for photovoltaic cell manufacturing.
	CN
	EU
	US
	APAC
	Inventories | Paste	Process-based life-cycle inventory for metallization paste production, an intermediate input for PV cell manufacturing. The dataset is derived as a weighted average of three formulations reported in the original source, based on their respective shares in cell production.
	Inventories | Silane	Life-cycle inventory for silane production, an intermediate input for PV cell manufacturing.
	Inventories | Wafer prod	Life-cycle inventory for wafer manufacturing.
	CN
	EU
	US
	APAC
	Inventories | Ingot prod	Life-cycle inventory for monocrystalline ingot production (Czochralski process).
	CN
	EU
	US
	APAC
	Inventories | SGS prod	Life-cycle inventory for solar grade silicon production (Modified Siemens process).
	CN
	EU
	US
	APAC
	Inventories | MGS prod	Life-cycle inventory for metallurgical grade silicon production.
	Inventories | CaF2 97%	Life-cycle inventory for fluorspar (97% purity).
	Inventories | HF	Life-cycle inventory for hydrogen fluoride.
	Inventories | HFC-152a	Life-cycle inventory for 1,1-difluoroethane.
	Inventories | VF	Life-cycle inventory for vinyl fluoride.
	Inventories | PVF	Life-cycle inventory for polivinylfluoride.
	Inventories | PVF disp	Life-cycle inventory for polivinylfluoride dispersion.
	Inventories | PVF film	Life-cycle inventory for polivinylfluoride film.
	Inventories | DB units	Units of measurement associated with each commodity included in the original EXIOBASE database.
2) Scenario assumptions
	Input parameters used to define the Baseline 2030 and NZIA scenarios.
	Sheet	Description
	Scenario assum. | Market shares	Regional production and trade shares for PV components
	Scenario assum. | 2030 implications	Assumptions on electricity demand and energy mix in EU27 by 2030
	Scenario assum. | NZIA	Specific assuptions for the NZIA scenario
3) Sensitivity analysis
	Parameters varied to assess the robustness of results.
	Sheet	Description
	Sensitivity analysis | Capacity factors	Regional PV capacity factors and alternative data sources
4) Impact factors and additional parameters
	Environmental characterization factors and other cross-cutting inputs.
	Sheet	Description
	Additional parameters | GWP	Fuel-specific combustion emission factors and Global Warming Potential factors
	Additional parameters | VA suppy chain	Calculation of the value added and employment for each stage of the PV supply chian
	Additional parameters | VA PV plant	Value added and employment data for the PV plant in each region
	Additional parameters | Transport	Calculation of the cost of transport for different transport mode
General notes
	All inventories are technology-specific for monocrystalline silicon PV.
	Data were harmonized and mapped to EXIOBASE sector classification using NACE concordance tables.
	When detailed information was not available, conservative assumptions based on literature averages were adopted.
	These inventories are used to construct the additional sectors in the MARIO hybrid MRIO model.

## Sheet: Inventories | Master
back to ReadMe
Region	Activity	Commodity	Functional unit	Inventory sheet
In which region is the activity being added?	Name of the new activity being added	Commodity output of such activity
GLOBAL	PV end of life management - landfill	PV end of life management	1 m2	EoL landfill
CN	Solar Power Plant	Solar	1 TJ	PV use CN
EU27	Solar Power Plant	Solar	1 TJ	PV use EU
WL	Solar Power Plant	Solar	1 TJ	PV use US
US	Solar Power Plant	Solar	1 TJ	PV use US
BR	Solar Power Plant	Solar	1 TJ	PV use US
WM	Solar Power Plant	Solar	1 TJ	PV use APAC
RU	Solar Power Plant	Solar	1 TJ	PV use EU
ZA	Solar Power Plant	Solar	1 TJ	PV use APAC
NO	Solar Power Plant	Solar	1 TJ	PV use EU
IN	Solar Power Plant	Solar	1 TJ	PV use APAC
JP	Solar Power Plant	Solar	1 TJ	PV use APAC
WA	Solar Power Plant	Solar	1 TJ	PV use APAC
CA	Solar Power Plant	Solar	1 TJ	PV use US
ID	Solar Power Plant	Solar	1 TJ	PV use APAC
WF	Solar Power Plant	Solar	1 TJ	PV use APAC
AU	Solar Power Plant	Solar	1 TJ	PV use APAC
TR	Solar Power Plant	Solar	1 TJ	PV use EU
GB	Solar Power Plant	Solar	1 TJ	PV use EU
MX	Solar Power Plant	Solar	1 TJ	PV use US
CH	Solar Power Plant	Solar	1 TJ	PV use EU
KR	Solar Power Plant	Solar	1 TJ	PV use APAC
WE	Solar Power Plant	Solar	1 TJ	PV use EU
CN	PV modules production	PV modules	1 m2	PV prod CN
EU27	PV modules production	PV modules	1 m2	PV prod EU
WL	PV modules production	PV modules	1 m2	PV prod US
US	PV modules production	PV modules	1 m2	PV prod US
BR	PV modules production	PV modules	1 m2	PV prod US
WM	PV modules production	PV modules	1 m2	PV prod APAC
RU	PV modules production	PV modules	1 m2	PV prod EU
ZA	PV modules production	PV modules	1 m2	PV prod APAC
NO	PV modules production	PV modules	1 m2	PV prod EU
IN	PV modules production	PV modules	1 m2	PV prod APAC
JP	PV modules production	PV modules	1 m2	PV prod APAC
WA	PV modules production	PV modules	1 m2	PV prod APAC
CA	PV modules production	PV modules	1 m2	PV prod US
ID	PV modules production	PV modules	1 m2	PV prod APAC
WF	PV modules production	PV modules	1 m2	PV prod APAC
AU	PV modules production	PV modules	1 m2	PV prod APAC
TR	PV modules production	PV modules	1 m2	PV prod EU
GB	PV modules production	PV modules	1 m2	PV prod EU
MX	PV modules production	PV modules	1 m2	PV prod US
CH	PV modules production	PV modules	1 m2	PV prod EU
KR	PV modules production	PV modules	1 m2	PV prod APAC
WE	PV modules production	PV modules	1 m2	PV prod EU
CN	Cells production	Cells	1 m2	Cell prod CN
EU27	Cells production	Cells	1 m2	Cell prod EU
WL	Cells production	Cells	1 m2	Cell prod US
US	Cells production	Cells	1 m2	Cell prod US
BR	Cells production	Cells	1 m2	Cell prod US
WM	Cells production	Cells	1 m2	Cell prod APAC
RU	Cells production	Cells	1 m2	Cell prod EU
ZA	Cells production	Cells	1 m2	Cell prod APAC
NO	Cells production	Cells	1 m2	Cell prod EU
IN	Cells production	Cells	1 m2	Cell prod APAC
JP	Cells production	Cells	1 m2	Cell prod APAC
WA	Cells production	Cells	1 m2	Cell prod APAC
CA	Cells production	Cells	1 m2	Cell prod US
ID	Cells production	Cells	1 m2	Cell prod APAC
WF	Cells production	Cells	1 m2	Cell prod APAC
AU	Cells production	Cells	1 m2	Cell prod APAC
TR	Cells production	Cells	1 m2	Cell prod EU
GB	Cells production	Cells	1 m2	Cell prod EU
MX	Cells production	Cells	1 m2	Cell prod US
CH	Cells production	Cells	1 m2	Cell prod EU
KR	Cells production	Cells	1 m2	Cell prod APAC
WE	Cells production	Cells	1 m2	Cell prod EU
GLOBAL	Metallization paste production	Metallization paste	1 kg	Paste
GLOBAL	Silane production	Silane	1 kg	Silane
CN	Wafer production	Wafer	1 m2	Wafer prod CN
EU27	Wafer production	Wafer	1 m2	Wafer prod EU
WL	Wafer production	Wafer	1 m2	Wafer prod US
US	Wafer production	Wafer	1 m2	Wafer prod US
BR	Wafer production	Wafer	1 m2	Wafer prod US
WM	Wafer production	Wafer	1 m2	Wafer prod APAC
RU	Wafer production	Wafer	1 m2	Wafer prod EU
ZA	Wafer production	Wafer	1 m2	Wafer prod APAC
NO	Wafer production	Wafer	1 m2	Wafer prod EU
IN	Wafer production	Wafer	1 m2	Wafer prod APAC
JP	Wafer production	Wafer	1 m2	Wafer prod APAC
WA	Wafer production	Wafer	1 m2	Wafer prod APAC
CA	Wafer production	Wafer	1 m2	Wafer prod US
ID	Wafer production	Wafer	1 m2	Wafer prod APAC
WF	Wafer production	Wafer	1 m2	Wafer prod APAC
AU	Wafer production	Wafer	1 m2	Wafer prod APAC
TR	Wafer production	Wafer	1 m2	Wafer prod EU
GB	Wafer production	Wafer	1 m2	Wafer prod EU
MX	Wafer production	Wafer	1 m2	Wafer prod US
CH	Wafer production	Wafer	1 m2	Wafer prod EU
KR	Wafer production	Wafer	1 m2	Wafer prod APAC
WE	Wafer production	Wafer	1 m2	Wafer prod EU
CN	Ingot production	Ingot	1 kg	Ingot prod CN
EU27	Ingot production	Ingot	1 kg	Ingot prod EU
WL	Ingot production	Ingot	1 kg	Ingot prod US
US	Ingot production	Ingot	1 kg	Ingot prod US
BR	Ingot production	Ingot	1 kg	Ingot prod US
WM	Ingot production	Ingot	1 kg	Ingot prod APAC
RU	Ingot production	Ingot	1 kg	Ingot prod EU
ZA	Ingot production	Ingot	1 kg	Ingot prod APAC
NO	Ingot production	Ingot	1 kg	Ingot prod EU
IN	Ingot production	Ingot	1 kg	Ingot prod APAC
JP	Ingot production	Ingot	1 kg	Ingot prod APAC
WA	Ingot production	Ingot	1 kg	Ingot prod APAC
CA	Ingot production	Ingot	1 kg	Ingot prod US
ID	Ingot production	Ingot	1 kg	Ingot prod APAC
WF	Ingot production	Ingot	1 kg	Ingot prod APAC
AU	Ingot production	Ingot	1 kg	Ingot prod APAC
TR	Ingot production	Ingot	1 kg	Ingot prod EU
GB	Ingot production	Ingot	1 kg	Ingot prod EU
MX	Ingot production	Ingot	1 kg	Ingot prod US
CH	Ingot production	Ingot	1 kg	Ingot prod EU
KR	Ingot production	Ingot	1 kg	Ingot prod APAC
WE	Ingot production	Ingot	1 kg	Ingot prod EU
CN	Solar Grade silicon production	Solar Grade silicon	1 kg	SGS prod CN
EU27	Solar Grade silicon production	Solar Grade silicon	1 kg	SGS prod EU
WL	Solar Grade silicon production	Solar Grade silicon	1 kg	SGS prod US
US	Solar Grade silicon production	Solar Grade silicon	1 kg	SGS prod US
BR	Solar Grade silicon production	Solar Grade silicon	1 kg	SGS prod US
WM	Solar Grade silicon production	Solar Grade silicon	1 kg	SGS prod APAC
RU	Solar Grade silicon production	Solar Grade silicon	1 kg	SGS prod EU
ZA	Solar Grade silicon production	Solar Grade silicon	1 kg	SGS prod APAC
NO	Solar Grade silicon production	Solar Grade silicon	1 kg	SGS prod EU
IN	Solar Grade silicon production	Solar Grade silicon	1 kg	SGS prod APAC
JP	Solar Grade silicon production	Solar Grade silicon	1 kg	SGS prod APAC
WA	Solar Grade silicon production	Solar Grade silicon	1 kg	SGS prod APAC
CA	Solar Grade silicon production	Solar Grade silicon	1 kg	SGS prod US
ID	Solar Grade silicon production	Solar Grade silicon	1 kg	SGS prod APAC
WF	Solar Grade silicon production	Solar Grade silicon	1 kg	SGS prod APAC
AU	Solar Grade silicon production	Solar Grade silicon	1 kg	SGS prod APAC
TR	Solar Grade silicon production	Solar Grade silicon	1 kg	SGS prod EU
GB	Solar Grade silicon production	Solar Grade silicon	1 kg	SGS prod EU
MX	Solar Grade silicon production	Solar Grade silicon	1 kg	SGS prod US
CH	Solar Grade silicon production	Solar Grade silicon	1 kg	SGS prod EU
KR	Solar Grade silicon production	Solar Grade silicon	1 kg	SGS prod APAC
WE	Solar Grade silicon production	Solar Grade silicon	1 kg	SGS prod EU
GLOBAL	Metallurgical Grade silicon production	Metallurgical Grade silicon	1 kg	MGS prod
GLOBAL	Fluorspar, 97% production	Fluorspar, 97%	1 kg	CaF2 97%
GLOBAL	Hydrogen fluoride production	Hydrogen fluoride	1 kg	HF
GLOBAL	1,1-difluoroethane, HFC-152a production	1,1-difluoroethane, HFC-152a	1 kg	HFC-152a
GLOBAL	Vinyl fluoride prod	Vinyl fluoride	1 kg	VF
GLOBAL	Polyvinylfluoride prod	Polyvinylfluoride	1 kg	PVF
GLOBAL	Polyvinylfluoride, dispersion prod	Polyvinylfluoride, dispersion	1 kg	PVF disp
GLOBAL	Polyvinylfluoride film prod	Polyvinylfluoride film	1 kg	PVF film

## Sheet: Inventories | EoL landfill
back to ReadMe
Input	Item type	EXIOBASE item	EXIOBASE Region	Change type	Unit	Quantity	Source
Diesel	Commodity	Gas/Diesel Oil	GLOBAL	Update	tonnes	5.90909e-05	Smith, Brittany L., Ashok Sekar, Heather Mirletz, Garvin Heath, and Robert Margolis. 2024. An Updated Life Cycle Assessment of Utility-Scale Solar Photovoltaic Systems Installed in the United States. Golden, CO: National Renewable Energy Laboratory. NREL/TP-7A40-87372. https://www.nrel.gov/docs/fy24osti/87372.pdf.
electricity, medium voltage	Commodity	Electricity	GLOBAL	Update	MJ	3.488	Smith, Brittany L., Ashok Sekar, Heather Mirletz, Garvin Heath, and Robert Margolis. 2024. An Updated Life Cycle Assessment of Utility-Scale Solar Photovoltaic Systems Installed in the United States. Golden, CO: National Renewable Energy Laboratory. NREL/TP-7A40-87372. https://www.nrel.gov/docs/fy24osti/87372.pdf.
electricity, medium voltage	Commodity	Electricity	GLOBAL	Update	MJ	0	Smith, Brittany L., Ashok Sekar, Heather Mirletz, Garvin Heath, and Robert Margolis. 2024. An Updated Life Cycle Assessment of Utility-Scale Solar Photovoltaic Systems Installed in the United States. Golden, CO: National Renewable Energy Laboratory. NREL/TP-7A40-87372. https://www.nrel.gov/docs/fy24osti/87372.pdf.
transport, freight, lorry	Commodity	Other land transportation services	GLOBAL	Update	Meuro	3.49539e-07	Smith, Brittany L., Ashok Sekar, Heather Mirletz, Garvin Heath, and Robert Margolis. 2024. An Updated Life Cycle Assessment of Utility-Scale Solar Photovoltaic Systems Installed in the United States. Golden, CO: National Renewable Energy Laboratory. NREL/TP-7A40-87372. https://www.nrel.gov/docs/fy24osti/87372.pdf.
average incineration residue	Commodity	Inert/metal/hazardous waste for treatment: landfill	GLOBAL	Update	tonnes (service)	0.0109	Smith, Brittany L., Ashok Sekar, Heather Mirletz, Garvin Heath, and Robert Margolis. 2024. An Updated Life Cycle Assessment of Utility-Scale Solar Photovoltaic Systems Installed in the United States. Golden, CO: National Renewable Energy Laboratory. NREL/TP-7A40-87372. https://www.nrel.gov/docs/fy24osti/87372.pdf.
CO2	Satellite account	Carbon dioxide	GLOBAL	Update	kg	0.19266	Estimation through GHG protocol data, emissions related to the combustion of 2.6 MJ of diesel.
CH4	Satellite account	CH4	GLOBAL	Update	kg	2.6e-05	Estimation through GHG protocol data, emissions related to the combustion of 2.6 MJ of diesel.
N2O	Satellite account	N2O	GLOBAL	Update	kg	1.56e-06	Estimation through GHG protocol data, emissions related to the combustion of 2.6 MJ of diesel.

## Sheet: Inventories | PV use CN
back to ReadMe
Input	Item type	EXIOBASE item	EXIOBASE Region	Change type	Unit	Quantity	Source
PV modules	Commodity	PV modules	GLOBAL	Update	m2	50.1495	Smith, Brittany L., Ashok Sekar, Heather Mirletz, Garvin Heath, and Robert Margolis. 2024. An Updated Life Cycle Assessment of Utility-Scale Solar Photovoltaic Systems Installed in the United States. Golden, CO: National Renewable Energy Laboratory. NREL/TP-7A40-87372. https://www.nrel.gov/docs/fy24osti/87372.pdf.
aluminium, wrought alloy	Commodity	Aluminium and aluminium products	GLOBAL	Update	kg	19.7633	Smith, Brittany L., Ashok Sekar, Heather Mirletz, Garvin Heath, and Robert Margolis. 2024. An Updated Life Cycle Assessment of Utility-Scale Solar Photovoltaic Systems Installed in the United States. Golden, CO: National Renewable Energy Laboratory. NREL/TP-7A40-87372. https://www.nrel.gov/docs/fy24osti/87372.pdf.
epoxy resin, liquid	Commodity	Chemicals nec	GLOBAL	Update	kg	0.00242101	Smith, Brittany L., Ashok Sekar, Heather Mirletz, Garvin Heath, and Robert Margolis. 2024. An Updated Life Cycle Assessment of Utility-Scale Solar Photovoltaic Systems Installed in the United States. Golden, CO: National Renewable Energy Laboratory. NREL/TP-7A40-87372. https://www.nrel.gov/docs/fy24osti/87372.pdf.
nylon 6	Commodity	Chemicals nec	GLOBAL	Update	kg	0.316213	Smith, Brittany L., Ashok Sekar, Heather Mirletz, Garvin Heath, and Robert Margolis. 2024. An Updated Life Cycle Assessment of Utility-Scale Solar Photovoltaic Systems Installed in the United States. Golden, CO: National Renewable Energy Laboratory. NREL/TP-7A40-87372. https://www.nrel.gov/docs/fy24osti/87372.pdf.
polycarbonate	Commodity	Chemicals nec	GLOBAL	Update	kg	0.00301391	Smith, Brittany L., Ashok Sekar, Heather Mirletz, Garvin Heath, and Robert Margolis. 2024. An Updated Life Cycle Assessment of Utility-Scale Solar Photovoltaic Systems Installed in the United States. Golden, CO: National Renewable Energy Laboratory. NREL/TP-7A40-87372. https://www.nrel.gov/docs/fy24osti/87372.pdf.
polyvinylchloride, bulk polymerised	Commodity	Chemicals nec	GLOBAL	Update	kg	5.43492	Smith, Brittany L., Ashok Sekar, Heather Mirletz, Garvin Heath, and Robert Margolis. 2024. An Updated Life Cycle Assessment of Utility-Scale Solar Photovoltaic Systems Installed in the United States. Golden, CO: National Renewable Energy Laboratory. NREL/TP-7A40-87372. https://www.nrel.gov/docs/fy24osti/87372.pdf.
wire drawing, copper	Commodity	Electrical machinery and apparatus n.e.c. (31)	GLOBAL	Update	kg	19.7633	Smith, Brittany L., Ashok Sekar, Heather Mirletz, Garvin Heath, and Robert Margolis. 2024. An Updated Life Cycle Assessment of Utility-Scale Solar Photovoltaic Systems Installed in the United States. Golden, CO: National Renewable Energy Laboratory. NREL/TP-7A40-87372. https://www.nrel.gov/docs/fy24osti/87372.pdf.
diesel, burned in building machine	Commodity	Gas/Diesel Oil	GLOBAL	Update	kg	2.98748	Smith, Brittany L., Ashok Sekar, Heather Mirletz, Garvin Heath, and Robert Margolis. 2024. An Updated Life Cycle Assessment of Utility-Scale Solar Photovoltaic Systems Installed in the United States. Golden, CO: National Renewable Energy Laboratory. NREL/TP-7A40-87372. https://www.nrel.gov/docs/fy24osti/87372.pdf.
electric motor, vehicle	Commodity	Electrical machinery and apparatus n.e.c. (31)	GLOBAL	Update	kg	0.839942	Smith, Brittany L., Ashok Sekar, Heather Mirletz, Garvin Heath, and Robert Margolis. 2024. An Updated Life Cycle Assessment of Utility-Scale Solar Photovoltaic Systems Installed in the United States. Golden, CO: National Renewable Energy Laboratory. NREL/TP-7A40-87372. https://www.nrel.gov/docs/fy24osti/87372.pdf.
petrol, low-sulfur	Commodity	Gas/Diesel Oil	GLOBAL	Update	kg	2.71746	Smith, Brittany L., Ashok Sekar, Heather Mirletz, Garvin Heath, and Robert Margolis. 2024. An Updated Life Cycle Assessment of Utility-Scale Solar Photovoltaic Systems Installed in the United States. Golden, CO: National Renewable Energy Laboratory. NREL/TP-7A40-87372. https://www.nrel.gov/docs/fy24osti/87372.pdf.
concrete slab	Commodity	Other non-metallic mineral products	GLOBAL	Update	kg	7.13958	Smith, Brittany L., Ashok Sekar, Heather Mirletz, Garvin Heath, and Robert Margolis. 2024. An Updated Life Cycle Assessment of Utility-Scale Solar Photovoltaic Systems Installed in the United States. Golden, CO: National Renewable Energy Laboratory. NREL/TP-7A40-87372. https://www.nrel.gov/docs/fy24osti/87372.pdf.
copper, cathode	Commodity	Copper products	GLOBAL	Update	kg	16.0192	Smith, Brittany L., Ashok Sekar, Heather Mirletz, Garvin Heath, and Robert Margolis. 2024. An Updated Life Cycle Assessment of Utility-Scale Solar Photovoltaic Systems Installed in the United States. Golden, CO: National Renewable Energy Laboratory. NREL/TP-7A40-87372. https://www.nrel.gov/docs/fy24osti/87372.pdf.
epoxy resin, liquid	Commodity	Plastics; basic	GLOBAL	Update	kg	2.90002	Smith, Brittany L., Ashok Sekar, Heather Mirletz, Garvin Heath, and Robert Margolis. 2024. An Updated Life Cycle Assessment of Utility-Scale Solar Photovoltaic Systems Installed in the United States. Golden, CO: National Renewable Energy Laboratory. NREL/TP-7A40-87372. https://www.nrel.gov/docs/fy24osti/87372.pdf.
ferrite	Commodity	Ceramic goods	GLOBAL	Update	kg	65.1815	Smith, Brittany L., Ashok Sekar, Heather Mirletz, Garvin Heath, and Robert Margolis. 2024. An Updated Life Cycle Assessment of Utility-Scale Solar Photovoltaic Systems Installed in the United States. Golden, CO: National Renewable Energy Laboratory. NREL/TP-7A40-87372. https://www.nrel.gov/docs/fy24osti/87372.pdf.
injection moulding	Commodity	Fabricated metal products; except machinery and equipment (28)	GLOBAL	Update	kg	2.90002	Smith, Brittany L., Ashok Sekar, Heather Mirletz, Garvin Heath, and Robert Margolis. 2024. An Updated Life Cycle Assessment of Utility-Scale Solar Photovoltaic Systems Installed in the United States. Golden, CO: National Renewable Energy Laboratory. NREL/TP-7A40-87372. https://www.nrel.gov/docs/fy24osti/87372.pdf.
lubricating oil	Commodity	Lubricants	GLOBAL	Update	kg	58.0005	Smith, Brittany L., Ashok Sekar, Heather Mirletz, Garvin Heath, and Robert Margolis. 2024. An Updated Life Cycle Assessment of Utility-Scale Solar Photovoltaic Systems Installed in the United States. Golden, CO: National Renewable Energy Laboratory. NREL/TP-7A40-87372. https://www.nrel.gov/docs/fy24osti/87372.pdf.
reinforcing steel	Commodity	Basic iron and steel and of ferro-alloys and first products thereof	GLOBAL	Update	kg	5.52385	Smith, Brittany L., Ashok Sekar, Heather Mirletz, Garvin Heath, and Robert Margolis. 2024. An Updated Life Cycle Assessment of Utility-Scale Solar Photovoltaic Systems Installed in the United States. Golden, CO: National Renewable Energy Laboratory. NREL/TP-7A40-87372. https://www.nrel.gov/docs/fy24osti/87372.pdf.
wire drawing, copper	Commodity	Electrical machinery and apparatus n.e.c. (31)	GLOBAL	Update	kg	16.0192	Smith, Brittany L., Ashok Sekar, Heather Mirletz, Garvin Heath, and Robert Margolis. 2024. An Updated Life Cycle Assessment of Utility-Scale Solar Photovoltaic Systems Installed in the United States. Golden, CO: National Renewable Energy Laboratory. NREL/TP-7A40-87372. https://www.nrel.gov/docs/fy24osti/87372.pdf.
aluminium, wrought alloy	Commodity	Aluminium and aluminium products	GLOBAL	Update	kg	0.220954	Smith, Brittany L., Ashok Sekar, Heather Mirletz, Garvin Heath, and Robert Margolis. 2024. An Updated Life Cycle Assessment of Utility-Scale Solar Photovoltaic Systems Installed in the United States. Golden, CO: National Renewable Energy Laboratory. NREL/TP-7A40-87372. https://www.nrel.gov/docs/fy24osti/87372.pdf.
cable, network cable, category 5, without plugs	Commodity	Electrical machinery and apparatus n.e.c. (31)	GLOBAL	Update	kg	0.0908674	Smith, Brittany L., Ashok Sekar, Heather Mirletz, Garvin Heath, and Robert Margolis. 2024. An Updated Life Cycle Assessment of Utility-Scale Solar Photovoltaic Systems Installed in the United States. Golden, CO: National Renewable Energy Laboratory. NREL/TP-7A40-87372. https://www.nrel.gov/docs/fy24osti/87372.pdf.
cable, three-conductor cable	Commodity	Electrical machinery and apparatus n.e.c. (31)	GLOBAL	Update	kg	0.175217	Smith, Brittany L., Ashok Sekar, Heather Mirletz, Garvin Heath, and Robert Margolis. 2024. An Updated Life Cycle Assessment of Utility-Scale Solar Photovoltaic Systems Installed in the United States. Golden, CO: National Renewable Energy Laboratory. NREL/TP-7A40-87372. https://www.nrel.gov/docs/fy24osti/87372.pdf.
capacitor, electrolyte type, >2 cm height	Commodity	Electrical machinery and apparatus n.e.c. (31)	GLOBAL	Update	kg	0.0138096	Smith, Brittany L., Ashok Sekar, Heather Mirletz, Garvin Heath, and Robert Margolis. 2024. An Updated Life Cycle Assessment of Utility-Scale Solar Photovoltaic Systems Installed in the United States. Golden, CO: National Renewable Energy Laboratory. NREL/TP-7A40-87372. https://www.nrel.gov/docs/fy24osti/87372.pdf.
capacitor, film type, for through-hole mounting	Commodity	Electrical machinery and apparatus n.e.c. (31)	GLOBAL	Update	kg	0.138096	Smith, Brittany L., Ashok Sekar, Heather Mirletz, Garvin Heath, and Robert Margolis. 2024. An Updated Life Cycle Assessment of Utility-Scale Solar Photovoltaic Systems Installed in the United States. Golden, CO: National Renewable Energy Laboratory. NREL/TP-7A40-87372. https://www.nrel.gov/docs/fy24osti/87372.pdf.
concrete slab	Commodity	Other non-metallic mineral products	GLOBAL	Update	kg	7.13958	Smith, Brittany L., Ashok Sekar, Heather Mirletz, Garvin Heath, and Robert Margolis. 2024. An Updated Life Cycle Assessment of Utility-Scale Solar Photovoltaic Systems Installed in the United States. Golden, CO: National Renewable Energy Laboratory. NREL/TP-7A40-87372. https://www.nrel.gov/docs/fy24osti/87372.pdf.
copper, cathode	Commodity	Copper products	GLOBAL	Update	kg	1.18763	Smith, Brittany L., Ashok Sekar, Heather Mirletz, Garvin Heath, and Robert Margolis. 2024. An Updated Life Cycle Assessment of Utility-Scale Solar Photovoltaic Systems Installed in the United States. Golden, CO: National Renewable Energy Laboratory. NREL/TP-7A40-87372. https://www.nrel.gov/docs/fy24osti/87372.pdf.
glass fibre reinforced plastic, polyamide, injection moulded	Commodity	Glass and glass products	GLOBAL	Update	kg	0.0828578	Smith, Brittany L., Ashok Sekar, Heather Mirletz, Garvin Heath, and Robert Margolis. 2024. An Updated Life Cycle Assessment of Utility-Scale Solar Photovoltaic Systems Installed in the United States. Golden, CO: National Renewable Energy Laboratory. NREL/TP-7A40-87372. https://www.nrel.gov/docs/fy24osti/87372.pdf.
inductor, ring core choke type	Commodity	Electrical machinery and apparatus n.e.c. (31)	GLOBAL	Update	kg	1.79525	Smith, Brittany L., Ashok Sekar, Heather Mirletz, Garvin Heath, and Robert Margolis. 2024. An Updated Life Cycle Assessment of Utility-Scale Solar Photovoltaic Systems Installed in the United States. Golden, CO: National Renewable Energy Laboratory. NREL/TP-7A40-87372. https://www.nrel.gov/docs/fy24osti/87372.pdf.
integrated circuit, logic type	Commodity	Electrical machinery and apparatus n.e.c. (31)	GLOBAL	Update	kg	0.000552385	Smith, Brittany L., Ashok Sekar, Heather Mirletz, Garvin Heath, and Robert Margolis. 2024. An Updated Life Cycle Assessment of Utility-Scale Solar Photovoltaic Systems Installed in the United States. Golden, CO: National Renewable Energy Laboratory. NREL/TP-7A40-87372. https://www.nrel.gov/docs/fy24osti/87372.pdf.
lubricating oil	Commodity	Lubricants	GLOBAL	Update	kg	0.00276193	Smith, Brittany L., Ashok Sekar, Heather Mirletz, Garvin Heath, and Robert Margolis. 2024. An Updated Life Cycle Assessment of Utility-Scale Solar Photovoltaic Systems Installed in the United States. Golden, CO: National Renewable Energy Laboratory. NREL/TP-7A40-87372. https://www.nrel.gov/docs/fy24osti/87372.pdf.
printed wiring board, through- hole mounted, unspecified, Pb free	Commodity	Electrical machinery and apparatus n.e.c. (31)	GLOBAL	Update	kg	0.00828578	Smith, Brittany L., Ashok Sekar, Heather Mirletz, Garvin Heath, and Robert Margolis. 2024. An Updated Life Cycle Assessment of Utility-Scale Solar Photovoltaic Systems Installed in the United States. Golden, CO: National Renewable Energy Laboratory. NREL/TP-7A40-87372. https://www.nrel.gov/docs/fy24osti/87372.pdf.
reinforcing steel	Commodity	Basic iron and steel and of ferro-alloys and first products thereof	GLOBAL	Update	kg	3.31431	Smith, Brittany L., Ashok Sekar, Heather Mirletz, Garvin Heath, and Robert Margolis. 2024. An Updated Life Cycle Assessment of Utility-Scale Solar Photovoltaic Systems Installed in the United States. Golden, CO: National Renewable Energy Laboratory. NREL/TP-7A40-87372. https://www.nrel.gov/docs/fy24osti/87372.pdf.
transformer, high voltage use	Commodity	Electrical machinery and apparatus n.e.c. (31)	GLOBAL	Update	kg	0.276193	Smith, Brittany L., Ashok Sekar, Heather Mirletz, Garvin Heath, and Robert Margolis. 2024. An Updated Life Cycle Assessment of Utility-Scale Solar Photovoltaic Systems Installed in the United States. Golden, CO: National Renewable Energy Laboratory. NREL/TP-7A40-87372. https://www.nrel.gov/docs/fy24osti/87372.pdf.
transistor, wired, big size, through-hole mounting	Commodity	Electrical machinery and apparatus n.e.c. (31)	GLOBAL	Update	kg	0.000828578	Smith, Brittany L., Ashok Sekar, Heather Mirletz, Garvin Heath, and Robert Margolis. 2024. An Updated Life Cycle Assessment of Utility-Scale Solar Photovoltaic Systems Installed in the United States. Golden, CO: National Renewable Energy Laboratory. NREL/TP-7A40-87372. https://www.nrel.gov/docs/fy24osti/87372.pdf.
fan, for power supply unit, desktop computer	Commodity	Electrical machinery and apparatus n.e.c. (31)	GLOBAL	Update	kg	0.000552385	Smith, Brittany L., Ashok Sekar, Heather Mirletz, Garvin Heath, and Robert Margolis. 2024. An Updated Life Cycle Assessment of Utility-Scale Solar Photovoltaic Systems Installed in the United States. Golden, CO: National Renewable Energy Laboratory. NREL/TP-7A40-87372. https://www.nrel.gov/docs/fy24osti/87372.pdf.
aluminium, wrought alloy	Commodity	Aluminium and aluminium products	GLOBAL	Update	kg	19.7633	Smith, Brittany L., Ashok Sekar, Heather Mirletz, Garvin Heath, and Robert Margolis. 2024. An Updated Life Cycle Assessment of Utility-Scale Solar Photovoltaic Systems Installed in the United States. Golden, CO: National Renewable Energy Laboratory. NREL/TP-7A40-87372. https://www.nrel.gov/docs/fy24osti/87372.pdf.
epoxy resin, liquid	Commodity	Plastics; basic	GLOBAL	Update	kg	0.00242101	Smith, Brittany L., Ashok Sekar, Heather Mirletz, Garvin Heath, and Robert Margolis. 2024. An Updated Life Cycle Assessment of Utility-Scale Solar Photovoltaic Systems Installed in the United States. Golden, CO: National Renewable Energy Laboratory. NREL/TP-7A40-87372. https://www.nrel.gov/docs/fy24osti/87372.pdf.
nylon 6	Commodity	Textiles (17)	GLOBAL	Update	kg	0.316213	Smith, Brittany L., Ashok Sekar, Heather Mirletz, Garvin Heath, and Robert Margolis. 2024. An Updated Life Cycle Assessment of Utility-Scale Solar Photovoltaic Systems Installed in the United States. Golden, CO: National Renewable Energy Laboratory. NREL/TP-7A40-87372. https://www.nrel.gov/docs/fy24osti/87372.pdf.
polycarbonate	Commodity	Plastics; basic	GLOBAL	Update	kg	0.00301391	Smith, Brittany L., Ashok Sekar, Heather Mirletz, Garvin Heath, and Robert Margolis. 2024. An Updated Life Cycle Assessment of Utility-Scale Solar Photovoltaic Systems Installed in the United States. Golden, CO: National Renewable Energy Laboratory. NREL/TP-7A40-87372. https://www.nrel.gov/docs/fy24osti/87372.pdf.
polyvinylchloride, bulk polymerised	Commodity	Chemicals nec	GLOBAL	Update	kg	5.43492	Smith, Brittany L., Ashok Sekar, Heather Mirletz, Garvin Heath, and Robert Margolis. 2024. An Updated Life Cycle Assessment of Utility-Scale Solar Photovoltaic Systems Installed in the United States. Golden, CO: National Renewable Energy Laboratory. NREL/TP-7A40-87372. https://www.nrel.gov/docs/fy24osti/87372.pdf.
wire drawing, copper	Commodity	Electrical machinery and apparatus n.e.c. (31)	GLOBAL	Update	kg	19.7633	Smith, Brittany L., Ashok Sekar, Heather Mirletz, Garvin Heath, and Robert Margolis. 2024. An Updated Life Cycle Assessment of Utility-Scale Solar Photovoltaic Systems Installed in the United States. Golden, CO: National Renewable Energy Laboratory. NREL/TP-7A40-87372. https://www.nrel.gov/docs/fy24osti/87372.pdf.
aluminium, wrought alloy	Commodity	Aluminium and aluminium products	GLOBAL	Update	kg	4.13054	Smith, Brittany L., Ashok Sekar, Heather Mirletz, Garvin Heath, and Robert Margolis. 2024. An Updated Life Cycle Assessment of Utility-Scale Solar Photovoltaic Systems Installed in the United States. Golden, CO: National Renewable Energy Laboratory. NREL/TP-7A40-87372. https://www.nrel.gov/docs/fy24osti/87372.pdf.
battery cell, Li-ion, LFP	Commodity	Electrical machinery and apparatus n.e.c. (31)	GLOBAL	Update	kg	0.227278	Smith, Brittany L., Ashok Sekar, Heather Mirletz, Garvin Heath, and Robert Margolis. 2024. An Updated Life Cycle Assessment of Utility-Scale Solar Photovoltaic Systems Installed in the United States. Golden, CO: National Renewable Energy Laboratory. NREL/TP-7A40-87372. https://www.nrel.gov/docs/fy24osti/87372.pdf.
corrugated board box	Commodity	Paper and paper products	GLOBAL	Update	kg	4.23924	Smith, Brittany L., Ashok Sekar, Heather Mirletz, Garvin Heath, and Robert Margolis. 2024. An Updated Life Cycle Assessment of Utility-Scale Solar Photovoltaic Systems Installed in the United States. Golden, CO: National Renewable Energy Laboratory. NREL/TP-7A40-87372. https://www.nrel.gov/docs/fy24osti/87372.pdf.
electric motor, vehicle	Commodity	Electrical machinery and apparatus n.e.c. (31)	GLOBAL	Update	kg	2.79157	Smith, Brittany L., Ashok Sekar, Heather Mirletz, Garvin Heath, and Robert Margolis. 2024. An Updated Life Cycle Assessment of Utility-Scale Solar Photovoltaic Systems Installed in the United States. Golden, CO: National Renewable Energy Laboratory. NREL/TP-7A40-87372. https://www.nrel.gov/docs/fy24osti/87372.pdf.
photovoltaic panel, single-Si wafer	Commodity	Wafer	GLOBAL	Update	m2	0.247042	Smith, Brittany L., Ashok Sekar, Heather Mirletz, Garvin Heath, and Robert Margolis. 2024. An Updated Life Cycle Assessment of Utility-Scale Solar Photovoltaic Systems Installed in the United States. Golden, CO: National Renewable Energy Laboratory. NREL/TP-7A40-87372. https://www.nrel.gov/docs/fy24osti/87372.pdf.
polystyrene, high impact	Commodity	Plastics; basic	GLOBAL	Update	kg	0.0393784	Smith, Brittany L., Ashok Sekar, Heather Mirletz, Garvin Heath, and Robert Margolis. 2024. An Updated Life Cycle Assessment of Utility-Scale Solar Photovoltaic Systems Installed in the United States. Golden, CO: National Renewable Energy Laboratory. NREL/TP-7A40-87372. https://www.nrel.gov/docs/fy24osti/87372.pdf.
section bar extrusion, aluminium	Commodity	Aluminium and aluminium products	GLOBAL	Update	kg	4.13054	Smith, Brittany L., Ashok Sekar, Heather Mirletz, Garvin Heath, and Robert Margolis. 2024. An Updated Life Cycle Assessment of Utility-Scale Solar Photovoltaic Systems Installed in the United States. Golden, CO: National Renewable Energy Laboratory. NREL/TP-7A40-87372. https://www.nrel.gov/docs/fy24osti/87372.pdf.
section bar rolling, steel	Commodity	Basic iron and steel and of ferro-alloys and first products thereof	GLOBAL	Update	kg	466.909	Smith, Brittany L., Ashok Sekar, Heather Mirletz, Garvin Heath, and Robert Margolis. 2024. An Updated Life Cycle Assessment of Utility-Scale Solar Photovoltaic Systems Installed in the United States. Golden, CO: National Renewable Energy Laboratory. NREL/TP-7A40-87372. https://www.nrel.gov/docs/fy24osti/87372.pdf.
section bar rolling, steel	Commodity	Basic iron and steel and of ferro-alloys and first products thereof	GLOBAL	Update	kg	4.13054	Smith, Brittany L., Ashok Sekar, Heather Mirletz, Garvin Heath, and Robert Margolis. 2024. An Updated Life Cycle Assessment of Utility-Scale Solar Photovoltaic Systems Installed in the United States. Golden, CO: National Renewable Energy Laboratory. NREL/TP-7A40-87372. https://www.nrel.gov/docs/fy24osti/87372.pdf.
steel, chromium steel 18/8	Commodity	Basic iron and steel and of ferro-alloys and first products thereof	GLOBAL	Update	kg	4.13054	Smith, Brittany L., Ashok Sekar, Heather Mirletz, Garvin Heath, and Robert Margolis. 2024. An Updated Life Cycle Assessment of Utility-Scale Solar Photovoltaic Systems Installed in the United States. Golden, CO: National Renewable Energy Laboratory. NREL/TP-7A40-87372. https://www.nrel.gov/docs/fy24osti/87372.pdf.
steel, low-alloyed, hot rolled	Commodity	Basic iron and steel and of ferro-alloys and first products thereof	GLOBAL	Update	kg	466.909	Smith, Brittany L., Ashok Sekar, Heather Mirletz, Garvin Heath, and Robert Margolis. 2024. An Updated Life Cycle Assessment of Utility-Scale Solar Photovoltaic Systems Installed in the United States. Golden, CO: National Renewable Energy Laboratory. NREL/TP-7A40-87372. https://www.nrel.gov/docs/fy24osti/87372.pdf.
Employment	Satellite account	Employment	GLOBAL	Update	1000 persons	0.000411111	https://doi.org/10.1016/j.rser.2017.05.039
CO2	Satellite account	Carbon dioxide	GLOBAL	Update	kg	9.51901	Estimation through GHG protocol data, emissions related to the combustion of 19.76 kg of diesel
CH4	Satellite account	CH4	GLOBAL	Update	kg	0.00128462	Estimation through GHG protocol data, emissions related to the combustion of 19.76 kg of diesel
N2O	Satellite account	N2O	GLOBAL	Update	kg	7.7077e-05	Estimation through GHG protocol data, emissions related to the combustion of 19.76 kg of diesel
CO2	Satellite account	Carbon dioxide	GLOBAL	Update	kg	8.65864	Estimation through GHG protocol data, emissions related to the combustion of 0,055 kg of diesel
CH4	Satellite account	CH4	GLOBAL	Update	kg	0.00116851	Estimation through GHG protocol data, emissions related to the combustion of 0,055 kg of diesel
N2O	Satellite account	N2O	GLOBAL	Update	kg	7.01104e-05	Estimation through GHG protocol data, emissions related to the combustion of 0,055 kg of diesel
transport, transoceanic freight ship	Commodity	Sea and coastal water transportation services	GLOBAL	Update	Meuro	0	Estimation through UN ComTrade data
transport, freight, lorry, fleet average	Commodity	Other land transportation services	GLOBAL	Update	Meuro	2.12543e-05	Estimation through UN ComTrade data
transport, freight, rail	Commodity	Railway transportation services	GLOBAL	Update	Meuro	0.000221696	Estimation through UN ComTrade data
EOL	Commodity	PV end of life management	GLOBAL	Update	m2	50.1495	Smith, Brittany L., Ashok Sekar, Heather Mirletz, Garvin Heath, and Robert Margolis. 2024. An Updated Life Cycle Assessment of Utility-Scale Solar Photovoltaic Systems Installed in the United States. Golden, CO: National Renewable Energy Laboratory. NREL/TP-7A40-87372. https://www.nrel.gov/docs/fy24osti/87372.pdf.

## Sheet: Inventories | PV use EU
back to ReadMe
Input	Item type	EXIOBASE item	EXIOBASE Region	Change type	Unit	Quantity	Source
PV modules	Commodity	PV modules	GLOBAL	Update	m2	50.1495	Smith, Brittany L., Ashok Sekar, Heather Mirletz, Garvin Heath, and Robert Margolis. 2024. An Updated Life Cycle Assessment of Utility-Scale Solar Photovoltaic Systems Installed in the United States. Golden, CO: National Renewable Energy Laboratory. NREL/TP-7A40-87372. https://www.nrel.gov/docs/fy24osti/87372.pdf.
aluminium, wrought alloy	Commodity	Aluminium and aluminium products	GLOBAL	Update	kg	19.7633	Smith, Brittany L., Ashok Sekar, Heather Mirletz, Garvin Heath, and Robert Margolis. 2024. An Updated Life Cycle Assessment of Utility-Scale Solar Photovoltaic Systems Installed in the United States. Golden, CO: National Renewable Energy Laboratory. NREL/TP-7A40-87372. https://www.nrel.gov/docs/fy24osti/87372.pdf.
epoxy resin, liquid	Commodity	Chemicals nec	GLOBAL	Update	kg	0.00242101	Smith, Brittany L., Ashok Sekar, Heather Mirletz, Garvin Heath, and Robert Margolis. 2024. An Updated Life Cycle Assessment of Utility-Scale Solar Photovoltaic Systems Installed in the United States. Golden, CO: National Renewable Energy Laboratory. NREL/TP-7A40-87372. https://www.nrel.gov/docs/fy24osti/87372.pdf.
nylon 6	Commodity	Chemicals nec	GLOBAL	Update	kg	0.316213	Smith, Brittany L., Ashok Sekar, Heather Mirletz, Garvin Heath, and Robert Margolis. 2024. An Updated Life Cycle Assessment of Utility-Scale Solar Photovoltaic Systems Installed in the United States. Golden, CO: National Renewable Energy Laboratory. NREL/TP-7A40-87372. https://www.nrel.gov/docs/fy24osti/87372.pdf.
polycarbonate	Commodity	Chemicals nec	GLOBAL	Update	kg	0.00301391	Smith, Brittany L., Ashok Sekar, Heather Mirletz, Garvin Heath, and Robert Margolis. 2024. An Updated Life Cycle Assessment of Utility-Scale Solar Photovoltaic Systems Installed in the United States. Golden, CO: National Renewable Energy Laboratory. NREL/TP-7A40-87372. https://www.nrel.gov/docs/fy24osti/87372.pdf.
polyvinylchloride, bulk polymerised	Commodity	Chemicals nec	GLOBAL	Update	kg	5.43492	Smith, Brittany L., Ashok Sekar, Heather Mirletz, Garvin Heath, and Robert Margolis. 2024. An Updated Life Cycle Assessment of Utility-Scale Solar Photovoltaic Systems Installed in the United States. Golden, CO: National Renewable Energy Laboratory. NREL/TP-7A40-87372. https://www.nrel.gov/docs/fy24osti/87372.pdf.
wire drawing, copper	Commodity	Electrical machinery and apparatus n.e.c. (31)	GLOBAL	Update	kg	19.7633	Smith, Brittany L., Ashok Sekar, Heather Mirletz, Garvin Heath, and Robert Margolis. 2024. An Updated Life Cycle Assessment of Utility-Scale Solar Photovoltaic Systems Installed in the United States. Golden, CO: National Renewable Energy Laboratory. NREL/TP-7A40-87372. https://www.nrel.gov/docs/fy24osti/87372.pdf.
diesel, burned in building machine	Commodity	Gas/Diesel Oil	GLOBAL	Update	kg	2.98748	Smith, Brittany L., Ashok Sekar, Heather Mirletz, Garvin Heath, and Robert Margolis. 2024. An Updated Life Cycle Assessment of Utility-Scale Solar Photovoltaic Systems Installed in the United States. Golden, CO: National Renewable Energy Laboratory. NREL/TP-7A40-87372. https://www.nrel.gov/docs/fy24osti/87372.pdf.
electric motor, vehicle	Commodity	Electrical machinery and apparatus n.e.c. (31)	GLOBAL	Update	kg	0.839942	Smith, Brittany L., Ashok Sekar, Heather Mirletz, Garvin Heath, and Robert Margolis. 2024. An Updated Life Cycle Assessment of Utility-Scale Solar Photovoltaic Systems Installed in the United States. Golden, CO: National Renewable Energy Laboratory. NREL/TP-7A40-87372. https://www.nrel.gov/docs/fy24osti/87372.pdf.
petrol, low-sulfur	Commodity	Gas/Diesel Oil	GLOBAL	Update	kg	2.71746	Smith, Brittany L., Ashok Sekar, Heather Mirletz, Garvin Heath, and Robert Margolis. 2024. An Updated Life Cycle Assessment of Utility-Scale Solar Photovoltaic Systems Installed in the United States. Golden, CO: National Renewable Energy Laboratory. NREL/TP-7A40-87372. https://www.nrel.gov/docs/fy24osti/87372.pdf.
concrete slab	Commodity	Other non-metallic mineral products	GLOBAL	Update	kg	7.13958	Smith, Brittany L., Ashok Sekar, Heather Mirletz, Garvin Heath, and Robert Margolis. 2024. An Updated Life Cycle Assessment of Utility-Scale Solar Photovoltaic Systems Installed in the United States. Golden, CO: National Renewable Energy Laboratory. NREL/TP-7A40-87372. https://www.nrel.gov/docs/fy24osti/87372.pdf.
copper, cathode	Commodity	Copper products	GLOBAL	Update	kg	16.0192	Smith, Brittany L., Ashok Sekar, Heather Mirletz, Garvin Heath, and Robert Margolis. 2024. An Updated Life Cycle Assessment of Utility-Scale Solar Photovoltaic Systems Installed in the United States. Golden, CO: National Renewable Energy Laboratory. NREL/TP-7A40-87372. https://www.nrel.gov/docs/fy24osti/87372.pdf.
epoxy resin, liquid	Commodity	Plastics; basic	GLOBAL	Update	kg	2.90002	Smith, Brittany L., Ashok Sekar, Heather Mirletz, Garvin Heath, and Robert Margolis. 2024. An Updated Life Cycle Assessment of Utility-Scale Solar Photovoltaic Systems Installed in the United States. Golden, CO: National Renewable Energy Laboratory. NREL/TP-7A40-87372. https://www.nrel.gov/docs/fy24osti/87372.pdf.
ferrite	Commodity	Ceramic goods	GLOBAL	Update	kg	65.1815	Smith, Brittany L., Ashok Sekar, Heather Mirletz, Garvin Heath, and Robert Margolis. 2024. An Updated Life Cycle Assessment of Utility-Scale Solar Photovoltaic Systems Installed in the United States. Golden, CO: National Renewable Energy Laboratory. NREL/TP-7A40-87372. https://www.nrel.gov/docs/fy24osti/87372.pdf.
injection moulding	Commodity	Fabricated metal products; except machinery and equipment (28)	GLOBAL	Update	kg	2.90002	Smith, Brittany L., Ashok Sekar, Heather Mirletz, Garvin Heath, and Robert Margolis. 2024. An Updated Life Cycle Assessment of Utility-Scale Solar Photovoltaic Systems Installed in the United States. Golden, CO: National Renewable Energy Laboratory. NREL/TP-7A40-87372. https://www.nrel.gov/docs/fy24osti/87372.pdf.
lubricating oil	Commodity	Lubricants	GLOBAL	Update	kg	58.0005	Smith, Brittany L., Ashok Sekar, Heather Mirletz, Garvin Heath, and Robert Margolis. 2024. An Updated Life Cycle Assessment of Utility-Scale Solar Photovoltaic Systems Installed in the United States. Golden, CO: National Renewable Energy Laboratory. NREL/TP-7A40-87372. https://www.nrel.gov/docs/fy24osti/87372.pdf.
reinforcing steel	Commodity	Basic iron and steel and of ferro-alloys and first products thereof	GLOBAL	Update	kg	5.52385	Smith, Brittany L., Ashok Sekar, Heather Mirletz, Garvin Heath, and Robert Margolis. 2024. An Updated Life Cycle Assessment of Utility-Scale Solar Photovoltaic Systems Installed in the United States. Golden, CO: National Renewable Energy Laboratory. NREL/TP-7A40-87372. https://www.nrel.gov/docs/fy24osti/87372.pdf.
wire drawing, copper	Commodity	Electrical machinery and apparatus n.e.c. (31)	GLOBAL	Update	kg	16.0192	Smith, Brittany L., Ashok Sekar, Heather Mirletz, Garvin Heath, and Robert Margolis. 2024. An Updated Life Cycle Assessment of Utility-Scale Solar Photovoltaic Systems Installed in the United States. Golden, CO: National Renewable Energy Laboratory. NREL/TP-7A40-87372. https://www.nrel.gov/docs/fy24osti/87372.pdf.
aluminium, wrought alloy	Commodity	Aluminium and aluminium products	GLOBAL	Update	kg	0.220954	Smith, Brittany L., Ashok Sekar, Heather Mirletz, Garvin Heath, and Robert Margolis. 2024. An Updated Life Cycle Assessment of Utility-Scale Solar Photovoltaic Systems Installed in the United States. Golden, CO: National Renewable Energy Laboratory. NREL/TP-7A40-87372. https://www.nrel.gov/docs/fy24osti/87372.pdf.
cable, network cable, category 5, without plugs	Commodity	Electrical machinery and apparatus n.e.c. (31)	GLOBAL	Update	kg	0.0908674	Smith, Brittany L., Ashok Sekar, Heather Mirletz, Garvin Heath, and Robert Margolis. 2024. An Updated Life Cycle Assessment of Utility-Scale Solar Photovoltaic Systems Installed in the United States. Golden, CO: National Renewable Energy Laboratory. NREL/TP-7A40-87372. https://www.nrel.gov/docs/fy24osti/87372.pdf.
cable, three-conductor cable	Commodity	Electrical machinery and apparatus n.e.c. (31)	GLOBAL	Update	kg	0.175217	Smith, Brittany L., Ashok Sekar, Heather Mirletz, Garvin Heath, and Robert Margolis. 2024. An Updated Life Cycle Assessment of Utility-Scale Solar Photovoltaic Systems Installed in the United States. Golden, CO: National Renewable Energy Laboratory. NREL/TP-7A40-87372. https://www.nrel.gov/docs/fy24osti/87372.pdf.
capacitor, electrolyte type, >2 cm height	Commodity	Electrical machinery and apparatus n.e.c. (31)	GLOBAL	Update	kg	0.0138096	Smith, Brittany L., Ashok Sekar, Heather Mirletz, Garvin Heath, and Robert Margolis. 2024. An Updated Life Cycle Assessment of Utility-Scale Solar Photovoltaic Systems Installed in the United States. Golden, CO: National Renewable Energy Laboratory. NREL/TP-7A40-87372. https://www.nrel.gov/docs/fy24osti/87372.pdf.
capacitor, film type, for through-hole mounting	Commodity	Electrical machinery and apparatus n.e.c. (31)	GLOBAL	Update	kg	0.138096	Smith, Brittany L., Ashok Sekar, Heather Mirletz, Garvin Heath, and Robert Margolis. 2024. An Updated Life Cycle Assessment of Utility-Scale Solar Photovoltaic Systems Installed in the United States. Golden, CO: National Renewable Energy Laboratory. NREL/TP-7A40-87372. https://www.nrel.gov/docs/fy24osti/87372.pdf.
concrete slab	Commodity	Other non-metallic mineral products	GLOBAL	Update	kg	7.13958	Smith, Brittany L., Ashok Sekar, Heather Mirletz, Garvin Heath, and Robert Margolis. 2024. An Updated Life Cycle Assessment of Utility-Scale Solar Photovoltaic Systems Installed in the United States. Golden, CO: National Renewable Energy Laboratory. NREL/TP-7A40-87372. https://www.nrel.gov/docs/fy24osti/87372.pdf.
copper, cathode	Commodity	Copper products	GLOBAL	Update	kg	1.18763	Smith, Brittany L., Ashok Sekar, Heather Mirletz, Garvin Heath, and Robert Margolis. 2024. An Updated Life Cycle Assessment of Utility-Scale Solar Photovoltaic Systems Installed in the United States. Golden, CO: National Renewable Energy Laboratory. NREL/TP-7A40-87372. https://www.nrel.gov/docs/fy24osti/87372.pdf.
glass fibre reinforced plastic, polyamide, injection moulded	Commodity	Glass and glass products	GLOBAL	Update	kg	0.0828578	Smith, Brittany L., Ashok Sekar, Heather Mirletz, Garvin Heath, and Robert Margolis. 2024. An Updated Life Cycle Assessment of Utility-Scale Solar Photovoltaic Systems Installed in the United States. Golden, CO: National Renewable Energy Laboratory. NREL/TP-7A40-87372. https://www.nrel.gov/docs/fy24osti/87372.pdf.
inductor, ring core choke type	Commodity	Electrical machinery and apparatus n.e.c. (31)	GLOBAL	Update	kg	1.79525	Smith, Brittany L., Ashok Sekar, Heather Mirletz, Garvin Heath, and Robert Margolis. 2024. An Updated Life Cycle Assessment of Utility-Scale Solar Photovoltaic Systems Installed in the United States. Golden, CO: National Renewable Energy Laboratory. NREL/TP-7A40-87372. https://www.nrel.gov/docs/fy24osti/87372.pdf.
integrated circuit, logic type	Commodity	Electrical machinery and apparatus n.e.c. (31)	GLOBAL	Update	kg	0.000552385	Smith, Brittany L., Ashok Sekar, Heather Mirletz, Garvin Heath, and Robert Margolis. 2024. An Updated Life Cycle Assessment of Utility-Scale Solar Photovoltaic Systems Installed in the United States. Golden, CO: National Renewable Energy Laboratory. NREL/TP-7A40-87372. https://www.nrel.gov/docs/fy24osti/87372.pdf.
lubricating oil	Commodity	Lubricants	GLOBAL	Update	kg	0.00276193	Smith, Brittany L., Ashok Sekar, Heather Mirletz, Garvin Heath, and Robert Margolis. 2024. An Updated Life Cycle Assessment of Utility-Scale Solar Photovoltaic Systems Installed in the United States. Golden, CO: National Renewable Energy Laboratory. NREL/TP-7A40-87372. https://www.nrel.gov/docs/fy24osti/87372.pdf.
printed wiring board, through- hole mounted, unspecified, Pb free	Commodity	Electrical machinery and apparatus n.e.c. (31)	GLOBAL	Update	kg	0.00828578	Smith, Brittany L., Ashok Sekar, Heather Mirletz, Garvin Heath, and Robert Margolis. 2024. An Updated Life Cycle Assessment of Utility-Scale Solar Photovoltaic Systems Installed in the United States. Golden, CO: National Renewable Energy Laboratory. NREL/TP-7A40-87372. https://www.nrel.gov/docs/fy24osti/87372.pdf.
reinforcing steel	Commodity	Basic iron and steel and of ferro-alloys and first products thereof	GLOBAL	Update	kg	3.31431	Smith, Brittany L., Ashok Sekar, Heather Mirletz, Garvin Heath, and Robert Margolis. 2024. An Updated Life Cycle Assessment of Utility-Scale Solar Photovoltaic Systems Installed in the United States. Golden, CO: National Renewable Energy Laboratory. NREL/TP-7A40-87372. https://www.nrel.gov/docs/fy24osti/87372.pdf.
transformer, high voltage use	Commodity	Electrical machinery and apparatus n.e.c. (31)	GLOBAL	Update	kg	0.276193	Smith, Brittany L., Ashok Sekar, Heather Mirletz, Garvin Heath, and Robert Margolis. 2024. An Updated Life Cycle Assessment of Utility-Scale Solar Photovoltaic Systems Installed in the United States. Golden, CO: National Renewable Energy Laboratory. NREL/TP-7A40-87372. https://www.nrel.gov/docs/fy24osti/87372.pdf.
transistor, wired, big size, through-hole mounting	Commodity	Electrical machinery and apparatus n.e.c. (31)	GLOBAL	Update	kg	0.000828578	Smith, Brittany L., Ashok Sekar, Heather Mirletz, Garvin Heath, and Robert Margolis. 2024. An Updated Life Cycle Assessment of Utility-Scale Solar Photovoltaic Systems Installed in the United States. Golden, CO: National Renewable Energy Laboratory. NREL/TP-7A40-87372. https://www.nrel.gov/docs/fy24osti/87372.pdf.
fan, for power supply unit, desktop computer	Commodity	Electrical machinery and apparatus n.e.c. (31)	GLOBAL	Update	kg	0.000552385	Smith, Brittany L., Ashok Sekar, Heather Mirletz, Garvin Heath, and Robert Margolis. 2024. An Updated Life Cycle Assessment of Utility-Scale Solar Photovoltaic Systems Installed in the United States. Golden, CO: National Renewable Energy Laboratory. NREL/TP-7A40-87372. https://www.nrel.gov/docs/fy24osti/87372.pdf.
aluminium, wrought alloy	Commodity	Aluminium and aluminium products	GLOBAL	Update	kg	19.7633	Smith, Brittany L., Ashok Sekar, Heather Mirletz, Garvin Heath, and Robert Margolis. 2024. An Updated Life Cycle Assessment of Utility-Scale Solar Photovoltaic Systems Installed in the United States. Golden, CO: National Renewable Energy Laboratory. NREL/TP-7A40-87372. https://www.nrel.gov/docs/fy24osti/87372.pdf.
epoxy resin, liquid	Commodity	Plastics; basic	GLOBAL	Update	kg	0.00242101	Smith, Brittany L., Ashok Sekar, Heather Mirletz, Garvin Heath, and Robert Margolis. 2024. An Updated Life Cycle Assessment of Utility-Scale Solar Photovoltaic Systems Installed in the United States. Golden, CO: National Renewable Energy Laboratory. NREL/TP-7A40-87372. https://www.nrel.gov/docs/fy24osti/87372.pdf.
nylon 6	Commodity	Textiles (17)	GLOBAL	Update	kg	0.316213	Smith, Brittany L., Ashok Sekar, Heather Mirletz, Garvin Heath, and Robert Margolis. 2024. An Updated Life Cycle Assessment of Utility-Scale Solar Photovoltaic Systems Installed in the United States. Golden, CO: National Renewable Energy Laboratory. NREL/TP-7A40-87372. https://www.nrel.gov/docs/fy24osti/87372.pdf.
polycarbonate	Commodity	Plastics; basic	GLOBAL	Update	kg	0.00301391	Smith, Brittany L., Ashok Sekar, Heather Mirletz, Garvin Heath, and Robert Margolis. 2024. An Updated Life Cycle Assessment of Utility-Scale Solar Photovoltaic Systems Installed in the United States. Golden, CO: National Renewable Energy Laboratory. NREL/TP-7A40-87372. https://www.nrel.gov/docs/fy24osti/87372.pdf.
polyvinylchloride, bulk polymerised	Commodity	Chemicals nec	GLOBAL	Update	kg	5.43492	Smith, Brittany L., Ashok Sekar, Heather Mirletz, Garvin Heath, and Robert Margolis. 2024. An Updated Life Cycle Assessment of Utility-Scale Solar Photovoltaic Systems Installed in the United States. Golden, CO: National Renewable Energy Laboratory. NREL/TP-7A40-87372. https://www.nrel.gov/docs/fy24osti/87372.pdf.
wire drawing, copper	Commodity	Electrical machinery and apparatus n.e.c. (31)	GLOBAL	Update	kg	19.7633	Smith, Brittany L., Ashok Sekar, Heather Mirletz, Garvin Heath, and Robert Margolis. 2024. An Updated Life Cycle Assessment of Utility-Scale Solar Photovoltaic Systems Installed in the United States. Golden, CO: National Renewable Energy Laboratory. NREL/TP-7A40-87372. https://www.nrel.gov/docs/fy24osti/87372.pdf.
aluminium, wrought alloy	Commodity	Aluminium and aluminium products	GLOBAL	Update	kg	4.13054	Smith, Brittany L., Ashok Sekar, Heather Mirletz, Garvin Heath, and Robert Margolis. 2024. An Updated Life Cycle Assessment of Utility-Scale Solar Photovoltaic Systems Installed in the United States. Golden, CO: National Renewable Energy Laboratory. NREL/TP-7A40-87372. https://www.nrel.gov/docs/fy24osti/87372.pdf.
battery cell, Li-ion, LFP	Commodity	Electrical machinery and apparatus n.e.c. (31)	GLOBAL	Update	kg	0.227278	Smith, Brittany L., Ashok Sekar, Heather Mirletz, Garvin Heath, and Robert Margolis. 2024. An Updated Life Cycle Assessment of Utility-Scale Solar Photovoltaic Systems Installed in the United States. Golden, CO: National Renewable Energy Laboratory. NREL/TP-7A40-87372. https://www.nrel.gov/docs/fy24osti/87372.pdf.
corrugated board box	Commodity	Paper and paper products	GLOBAL	Update	kg	4.23924	Smith, Brittany L., Ashok Sekar, Heather Mirletz, Garvin Heath, and Robert Margolis. 2024. An Updated Life Cycle Assessment of Utility-Scale Solar Photovoltaic Systems Installed in the United States. Golden, CO: National Renewable Energy Laboratory. NREL/TP-7A40-87372. https://www.nrel.gov/docs/fy24osti/87372.pdf.
electric motor, vehicle	Commodity	Electrical machinery and apparatus n.e.c. (31)	GLOBAL	Update	kg	2.79157	Smith, Brittany L., Ashok Sekar, Heather Mirletz, Garvin Heath, and Robert Margolis. 2024. An Updated Life Cycle Assessment of Utility-Scale Solar Photovoltaic Systems Installed in the United States. Golden, CO: National Renewable Energy Laboratory. NREL/TP-7A40-87372. https://www.nrel.gov/docs/fy24osti/87372.pdf.
photovoltaic panel, single-Si wafer	Commodity	Wafer	GLOBAL	Update	m2	0.247042	Smith, Brittany L., Ashok Sekar, Heather Mirletz, Garvin Heath, and Robert Margolis. 2024. An Updated Life Cycle Assessment of Utility-Scale Solar Photovoltaic Systems Installed in the United States. Golden, CO: National Renewable Energy Laboratory. NREL/TP-7A40-87372. https://www.nrel.gov/docs/fy24osti/87372.pdf.
polystyrene, high impact	Commodity	Plastics; basic	GLOBAL	Update	kg	0.0393784	Smith, Brittany L., Ashok Sekar, Heather Mirletz, Garvin Heath, and Robert Margolis. 2024. An Updated Life Cycle Assessment of Utility-Scale Solar Photovoltaic Systems Installed in the United States. Golden, CO: National Renewable Energy Laboratory. NREL/TP-7A40-87372. https://www.nrel.gov/docs/fy24osti/87372.pdf.
section bar extrusion, aluminium	Commodity	Aluminium and aluminium products	GLOBAL	Update	kg	4.13054	Smith, Brittany L., Ashok Sekar, Heather Mirletz, Garvin Heath, and Robert Margolis. 2024. An Updated Life Cycle Assessment of Utility-Scale Solar Photovoltaic Systems Installed in the United States. Golden, CO: National Renewable Energy Laboratory. NREL/TP-7A40-87372. https://www.nrel.gov/docs/fy24osti/87372.pdf.
section bar rolling, steel	Commodity	Basic iron and steel and of ferro-alloys and first products thereof	GLOBAL	Update	kg	466.909	Smith, Brittany L., Ashok Sekar, Heather Mirletz, Garvin Heath, and Robert Margolis. 2024. An Updated Life Cycle Assessment of Utility-Scale Solar Photovoltaic Systems Installed in the United States. Golden, CO: National Renewable Energy Laboratory. NREL/TP-7A40-87372. https://www.nrel.gov/docs/fy24osti/87372.pdf.
section bar rolling, steel	Commodity	Basic iron and steel and of ferro-alloys and first products thereof	GLOBAL	Update	kg	4.13054	Smith, Brittany L., Ashok Sekar, Heather Mirletz, Garvin Heath, and Robert Margolis. 2024. An Updated Life Cycle Assessment of Utility-Scale Solar Photovoltaic Systems Installed in the United States. Golden, CO: National Renewable Energy Laboratory. NREL/TP-7A40-87372. https://www.nrel.gov/docs/fy24osti/87372.pdf.
steel, chromium steel 18/8	Commodity	Basic iron and steel and of ferro-alloys and first products thereof	GLOBAL	Update	kg	4.13054	Smith, Brittany L., Ashok Sekar, Heather Mirletz, Garvin Heath, and Robert Margolis. 2024. An Updated Life Cycle Assessment of Utility-Scale Solar Photovoltaic Systems Installed in the United States. Golden, CO: National Renewable Energy Laboratory. NREL/TP-7A40-87372. https://www.nrel.gov/docs/fy24osti/87372.pdf.
steel, low-alloyed, hot rolled	Commodity	Basic iron and steel and of ferro-alloys and first products thereof	GLOBAL	Update	kg	466.909	Smith, Brittany L., Ashok Sekar, Heather Mirletz, Garvin Heath, and Robert Margolis. 2024. An Updated Life Cycle Assessment of Utility-Scale Solar Photovoltaic Systems Installed in the United States. Golden, CO: National Renewable Energy Laboratory. NREL/TP-7A40-87372. https://www.nrel.gov/docs/fy24osti/87372.pdf.
Employment	Satellite account	Employment	GLOBAL	Update	1000 persons	0.000411111	https://doi.org/10.1016/j.rser.2017.05.039
CO2	Satellite account	Carbon dioxide	GLOBAL	Update	kg	9.51901	Estimation through GHG protocol data, emissions related to the combustion of 19.76 kg of diesel
CH4	Satellite account	CH4	GLOBAL	Update	kg	0.00128462	Estimation through GHG protocol data, emissions related to the combustion of 19.76 kg of diesel
N2O	Satellite account	N2O	GLOBAL	Update	kg	7.7077e-05	Estimation through GHG protocol data, emissions related to the combustion of 19.76 kg of diesel
CO2	Satellite account	Carbon dioxide	GLOBAL	Update	kg	8.65864	Estimation through GHG protocol data, emissions related to the combustion of 0,055 kg of diesel
CH4	Satellite account	CH4	GLOBAL	Update	kg	0.00116851	Estimation through GHG protocol data, emissions related to the combustion of 0,055 kg of diesel
N2O	Satellite account	N2O	GLOBAL	Update	kg	7.01104e-05	Estimation through GHG protocol data, emissions related to the combustion of 0,055 kg of diesel
transport, transoceanic freight ship	Commodity	Sea and coastal water transportation services	GLOBAL	Update	Meuro	0.00030062	Estimation through UN ComTrade data
transport, freight, lorry, fleet average	Commodity	Other land transportation services	GLOBAL	Update	Meuro	0.00040076	Estimation through UN ComTrade data
transport, freight, rail	Commodity	Railway transportation services	GLOBAL	Update	Meuro	0	Estimation through UN ComTrade data
EOL	Commodity	PV end of life management	GLOBAL	Update	m2	50.1495	Smith, Brittany L., Ashok Sekar, Heather Mirletz, Garvin Heath, and Robert Margolis. 2024. An Updated Life Cycle Assessment of Utility-Scale Solar Photovoltaic Systems Installed in the United States. Golden, CO: National Renewable Energy Laboratory. NREL/TP-7A40-87372. https://www.nrel.gov/docs/fy24osti/87372.pdf.

## Sheet: Inventories | PV use US
back to ReadMe
Input	Item type	EXIOBASE item	EXIOBASE Region	Change type	Unit	Quantity	Source
PV modules	Commodity	PV modules	GLOBAL	Update	m2	50.1495	Smith, Brittany L., Ashok Sekar, Heather Mirletz, Garvin Heath, and Robert Margolis. 2024. An Updated Life Cycle Assessment of Utility-Scale Solar Photovoltaic Systems Installed in the United States. Golden, CO: National Renewable Energy Laboratory. NREL/TP-7A40-87372. https://www.nrel.gov/docs/fy24osti/87372.pdf.
aluminium, wrought alloy	Commodity	Aluminium and aluminium products	GLOBAL	Update	kg	19.7633	Smith, Brittany L., Ashok Sekar, Heather Mirletz, Garvin Heath, and Robert Margolis. 2024. An Updated Life Cycle Assessment of Utility-Scale Solar Photovoltaic Systems Installed in the United States. Golden, CO: National Renewable Energy Laboratory. NREL/TP-7A40-87372. https://www.nrel.gov/docs/fy24osti/87372.pdf.
epoxy resin, liquid	Commodity	Chemicals nec	GLOBAL	Update	kg	0.00242101	Smith, Brittany L., Ashok Sekar, Heather Mirletz, Garvin Heath, and Robert Margolis. 2024. An Updated Life Cycle Assessment of Utility-Scale Solar Photovoltaic Systems Installed in the United States. Golden, CO: National Renewable Energy Laboratory. NREL/TP-7A40-87372. https://www.nrel.gov/docs/fy24osti/87372.pdf.
nylon 6	Commodity	Chemicals nec	GLOBAL	Update	kg	0.316213	Smith, Brittany L., Ashok Sekar, Heather Mirletz, Garvin Heath, and Robert Margolis. 2024. An Updated Life Cycle Assessment of Utility-Scale Solar Photovoltaic Systems Installed in the United States. Golden, CO: National Renewable Energy Laboratory. NREL/TP-7A40-87372. https://www.nrel.gov/docs/fy24osti/87372.pdf.
polycarbonate	Commodity	Chemicals nec	GLOBAL	Update	kg	0.00301391	Smith, Brittany L., Ashok Sekar, Heather Mirletz, Garvin Heath, and Robert Margolis. 2024. An Updated Life Cycle Assessment of Utility-Scale Solar Photovoltaic Systems Installed in the United States. Golden, CO: National Renewable Energy Laboratory. NREL/TP-7A40-87372. https://www.nrel.gov/docs/fy24osti/87372.pdf.
polyvinylchloride, bulk polymerised	Commodity	Chemicals nec	GLOBAL	Update	kg	5.43492	Smith, Brittany L., Ashok Sekar, Heather Mirletz, Garvin Heath, and Robert Margolis. 2024. An Updated Life Cycle Assessment of Utility-Scale Solar Photovoltaic Systems Installed in the United States. Golden, CO: National Renewable Energy Laboratory. NREL/TP-7A40-87372. https://www.nrel.gov/docs/fy24osti/87372.pdf.
wire drawing, copper	Commodity	Electrical machinery and apparatus n.e.c. (31)	GLOBAL	Update	kg	19.7633	Smith, Brittany L., Ashok Sekar, Heather Mirletz, Garvin Heath, and Robert Margolis. 2024. An Updated Life Cycle Assessment of Utility-Scale Solar Photovoltaic Systems Installed in the United States. Golden, CO: National Renewable Energy Laboratory. NREL/TP-7A40-87372. https://www.nrel.gov/docs/fy24osti/87372.pdf.
diesel, burned in building machine	Commodity	Gas/Diesel Oil	GLOBAL	Update	kg	2.98748	Smith, Brittany L., Ashok Sekar, Heather Mirletz, Garvin Heath, and Robert Margolis. 2024. An Updated Life Cycle Assessment of Utility-Scale Solar Photovoltaic Systems Installed in the United States. Golden, CO: National Renewable Energy Laboratory. NREL/TP-7A40-87372. https://www.nrel.gov/docs/fy24osti/87372.pdf.
electric motor, vehicle	Commodity	Electrical machinery and apparatus n.e.c. (31)	GLOBAL	Update	kg	0.839942	Smith, Brittany L., Ashok Sekar, Heather Mirletz, Garvin Heath, and Robert Margolis. 2024. An Updated Life Cycle Assessment of Utility-Scale Solar Photovoltaic Systems Installed in the United States. Golden, CO: National Renewable Energy Laboratory. NREL/TP-7A40-87372. https://www.nrel.gov/docs/fy24osti/87372.pdf.
petrol, low-sulfur	Commodity	Gas/Diesel Oil	GLOBAL	Update	kg	2.71746	Smith, Brittany L., Ashok Sekar, Heather Mirletz, Garvin Heath, and Robert Margolis. 2024. An Updated Life Cycle Assessment of Utility-Scale Solar Photovoltaic Systems Installed in the United States. Golden, CO: National Renewable Energy Laboratory. NREL/TP-7A40-87372. https://www.nrel.gov/docs/fy24osti/87372.pdf.
concrete slab	Commodity	Other non-metallic mineral products	GLOBAL	Update	kg	7.13958	Smith, Brittany L., Ashok Sekar, Heather Mirletz, Garvin Heath, and Robert Margolis. 2024. An Updated Life Cycle Assessment of Utility-Scale Solar Photovoltaic Systems Installed in the United States. Golden, CO: National Renewable Energy Laboratory. NREL/TP-7A40-87372. https://www.nrel.gov/docs/fy24osti/87372.pdf.
copper, cathode	Commodity	Copper products	GLOBAL	Update	kg	16.0192	Smith, Brittany L., Ashok Sekar, Heather Mirletz, Garvin Heath, and Robert Margolis. 2024. An Updated Life Cycle Assessment of Utility-Scale Solar Photovoltaic Systems Installed in the United States. Golden, CO: National Renewable Energy Laboratory. NREL/TP-7A40-87372. https://www.nrel.gov/docs/fy24osti/87372.pdf.
epoxy resin, liquid	Commodity	Plastics; basic	GLOBAL	Update	kg	2.90002	Smith, Brittany L., Ashok Sekar, Heather Mirletz, Garvin Heath, and Robert Margolis. 2024. An Updated Life Cycle Assessment of Utility-Scale Solar Photovoltaic Systems Installed in the United States. Golden, CO: National Renewable Energy Laboratory. NREL/TP-7A40-87372. https://www.nrel.gov/docs/fy24osti/87372.pdf.
ferrite	Commodity	Ceramic goods	GLOBAL	Update	kg	65.1815	Smith, Brittany L., Ashok Sekar, Heather Mirletz, Garvin Heath, and Robert Margolis. 2024. An Updated Life Cycle Assessment of Utility-Scale Solar Photovoltaic Systems Installed in the United States. Golden, CO: National Renewable Energy Laboratory. NREL/TP-7A40-87372. https://www.nrel.gov/docs/fy24osti/87372.pdf.
injection moulding	Commodity	Fabricated metal products; except machinery and equipment (28)	GLOBAL	Update	kg	2.90002	Smith, Brittany L., Ashok Sekar, Heather Mirletz, Garvin Heath, and Robert Margolis. 2024. An Updated Life Cycle Assessment of Utility-Scale Solar Photovoltaic Systems Installed in the United States. Golden, CO: National Renewable Energy Laboratory. NREL/TP-7A40-87372. https://www.nrel.gov/docs/fy24osti/87372.pdf.
lubricating oil	Commodity	Lubricants	GLOBAL	Update	kg	58.0005	Smith, Brittany L., Ashok Sekar, Heather Mirletz, Garvin Heath, and Robert Margolis. 2024. An Updated Life Cycle Assessment of Utility-Scale Solar Photovoltaic Systems Installed in the United States. Golden, CO: National Renewable Energy Laboratory. NREL/TP-7A40-87372. https://www.nrel.gov/docs/fy24osti/87372.pdf.
reinforcing steel	Commodity	Basic iron and steel and of ferro-alloys and first products thereof	GLOBAL	Update	kg	5.52385	Smith, Brittany L., Ashok Sekar, Heather Mirletz, Garvin Heath, and Robert Margolis. 2024. An Updated Life Cycle Assessment of Utility-Scale Solar Photovoltaic Systems Installed in the United States. Golden, CO: National Renewable Energy Laboratory. NREL/TP-7A40-87372. https://www.nrel.gov/docs/fy24osti/87372.pdf.
wire drawing, copper	Commodity	Electrical machinery and apparatus n.e.c. (31)	GLOBAL	Update	kg	16.0192	Smith, Brittany L., Ashok Sekar, Heather Mirletz, Garvin Heath, and Robert Margolis. 2024. An Updated Life Cycle Assessment of Utility-Scale Solar Photovoltaic Systems Installed in the United States. Golden, CO: National Renewable Energy Laboratory. NREL/TP-7A40-87372. https://www.nrel.gov/docs/fy24osti/87372.pdf.
aluminium, wrought alloy	Commodity	Aluminium and aluminium products	GLOBAL	Update	kg	0.220954	Smith, Brittany L., Ashok Sekar, Heather Mirletz, Garvin Heath, and Robert Margolis. 2024. An Updated Life Cycle Assessment of Utility-Scale Solar Photovoltaic Systems Installed in the United States. Golden, CO: National Renewable Energy Laboratory. NREL/TP-7A40-87372. https://www.nrel.gov/docs/fy24osti/87372.pdf.
cable, network cable, category 5, without plugs	Commodity	Electrical machinery and apparatus n.e.c. (31)	GLOBAL	Update	kg	0.0908674	Smith, Brittany L., Ashok Sekar, Heather Mirletz, Garvin Heath, and Robert Margolis. 2024. An Updated Life Cycle Assessment of Utility-Scale Solar Photovoltaic Systems Installed in the United States. Golden, CO: National Renewable Energy Laboratory. NREL/TP-7A40-87372. https://www.nrel.gov/docs/fy24osti/87372.pdf.
cable, three-conductor cable	Commodity	Electrical machinery and apparatus n.e.c. (31)	GLOBAL	Update	kg	0.175217	Smith, Brittany L., Ashok Sekar, Heather Mirletz, Garvin Heath, and Robert Margolis. 2024. An Updated Life Cycle Assessment of Utility-Scale Solar Photovoltaic Systems Installed in the United States. Golden, CO: National Renewable Energy Laboratory. NREL/TP-7A40-87372. https://www.nrel.gov/docs/fy24osti/87372.pdf.
capacitor, electrolyte type, >2 cm height	Commodity	Electrical machinery and apparatus n.e.c. (31)	GLOBAL	Update	kg	0.0138096	Smith, Brittany L., Ashok Sekar, Heather Mirletz, Garvin Heath, and Robert Margolis. 2024. An Updated Life Cycle Assessment of Utility-Scale Solar Photovoltaic Systems Installed in the United States. Golden, CO: National Renewable Energy Laboratory. NREL/TP-7A40-87372. https://www.nrel.gov/docs/fy24osti/87372.pdf.
capacitor, film type, for through-hole mounting	Commodity	Electrical machinery and apparatus n.e.c. (31)	GLOBAL	Update	kg	0.138096	Smith, Brittany L., Ashok Sekar, Heather Mirletz, Garvin Heath, and Robert Margolis. 2024. An Updated Life Cycle Assessment of Utility-Scale Solar Photovoltaic Systems Installed in the United States. Golden, CO: National Renewable Energy Laboratory. NREL/TP-7A40-87372. https://www.nrel.gov/docs/fy24osti/87372.pdf.
concrete slab	Commodity	Other non-metallic mineral products	GLOBAL	Update	kg	7.13958	Smith, Brittany L., Ashok Sekar, Heather Mirletz, Garvin Heath, and Robert Margolis. 2024. An Updated Life Cycle Assessment of Utility-Scale Solar Photovoltaic Systems Installed in the United States. Golden, CO: National Renewable Energy Laboratory. NREL/TP-7A40-87372. https://www.nrel.gov/docs/fy24osti/87372.pdf.
copper, cathode	Commodity	Copper products	GLOBAL	Update	kg	1.18763	Smith, Brittany L., Ashok Sekar, Heather Mirletz, Garvin Heath, and Robert Margolis. 2024. An Updated Life Cycle Assessment of Utility-Scale Solar Photovoltaic Systems Installed in the United States. Golden, CO: National Renewable Energy Laboratory. NREL/TP-7A40-87372. https://www.nrel.gov/docs/fy24osti/87372.pdf.
glass fibre reinforced plastic, polyamide, injection moulded	Commodity	Glass and glass products	GLOBAL	Update	kg	0.0828578	Smith, Brittany L., Ashok Sekar, Heather Mirletz, Garvin Heath, and Robert Margolis. 2024. An Updated Life Cycle Assessment of Utility-Scale Solar Photovoltaic Systems Installed in the United States. Golden, CO: National Renewable Energy Laboratory. NREL/TP-7A40-87372. https://www.nrel.gov/docs/fy24osti/87372.pdf.
inductor, ring core choke type	Commodity	Electrical machinery and apparatus n.e.c. (31)	GLOBAL	Update	kg	1.79525	Smith, Brittany L., Ashok Sekar, Heather Mirletz, Garvin Heath, and Robert Margolis. 2024. An Updated Life Cycle Assessment of Utility-Scale Solar Photovoltaic Systems Installed in the United States. Golden, CO: National Renewable Energy Laboratory. NREL/TP-7A40-87372. https://www.nrel.gov/docs/fy24osti/87372.pdf.
integrated circuit, logic type	Commodity	Electrical machinery and apparatus n.e.c. (31)	GLOBAL	Update	kg	0.000552385	Smith, Brittany L., Ashok Sekar, Heather Mirletz, Garvin Heath, and Robert Margolis. 2024. An Updated Life Cycle Assessment of Utility-Scale Solar Photovoltaic Systems Installed in the United States. Golden, CO: National Renewable Energy Laboratory. NREL/TP-7A40-87372. https://www.nrel.gov/docs/fy24osti/87372.pdf.
lubricating oil	Commodity	Lubricants	GLOBAL	Update	kg	0.00276193	Smith, Brittany L., Ashok Sekar, Heather Mirletz, Garvin Heath, and Robert Margolis. 2024. An Updated Life Cycle Assessment of Utility-Scale Solar Photovoltaic Systems Installed in the United States. Golden, CO: National Renewable Energy Laboratory. NREL/TP-7A40-87372. https://www.nrel.gov/docs/fy24osti/87372.pdf.
printed wiring board, through- hole mounted, unspecified, Pb free	Commodity	Electrical machinery and apparatus n.e.c. (31)	GLOBAL	Update	kg	0.00828578	Smith, Brittany L., Ashok Sekar, Heather Mirletz, Garvin Heath, and Robert Margolis. 2024. An Updated Life Cycle Assessment of Utility-Scale Solar Photovoltaic Systems Installed in the United States. Golden, CO: National Renewable Energy Laboratory. NREL/TP-7A40-87372. https://www.nrel.gov/docs/fy24osti/87372.pdf.
reinforcing steel	Commodity	Basic iron and steel and of ferro-alloys and first products thereof	GLOBAL	Update	kg	3.31431	Smith, Brittany L., Ashok Sekar, Heather Mirletz, Garvin Heath, and Robert Margolis. 2024. An Updated Life Cycle Assessment of Utility-Scale Solar Photovoltaic Systems Installed in the United States. Golden, CO: National Renewable Energy Laboratory. NREL/TP-7A40-87372. https://www.nrel.gov/docs/fy24osti/87372.pdf.
transformer, high voltage use	Commodity	Electrical machinery and apparatus n.e.c. (31)	GLOBAL	Update	kg	0.276193	Smith, Brittany L., Ashok Sekar, Heather Mirletz, Garvin Heath, and Robert Margolis. 2024. An Updated Life Cycle Assessment of Utility-Scale Solar Photovoltaic Systems Installed in the United States. Golden, CO: National Renewable Energy Laboratory. NREL/TP-7A40-87372. https://www.nrel.gov/docs/fy24osti/87372.pdf.
transistor, wired, big size, through-hole mounting	Commodity	Electrical machinery and apparatus n.e.c. (31)	GLOBAL	Update	kg	0.000828578	Smith, Brittany L., Ashok Sekar, Heather Mirletz, Garvin Heath, and Robert Margolis. 2024. An Updated Life Cycle Assessment of Utility-Scale Solar Photovoltaic Systems Installed in the United States. Golden, CO: National Renewable Energy Laboratory. NREL/TP-7A40-87372. https://www.nrel.gov/docs/fy24osti/87372.pdf.
fan, for power supply unit, desktop computer	Commodity	Electrical machinery and apparatus n.e.c. (31)	GLOBAL	Update	kg	0.000552385	Smith, Brittany L., Ashok Sekar, Heather Mirletz, Garvin Heath, and Robert Margolis. 2024. An Updated Life Cycle Assessment of Utility-Scale Solar Photovoltaic Systems Installed in the United States. Golden, CO: National Renewable Energy Laboratory. NREL/TP-7A40-87372. https://www.nrel.gov/docs/fy24osti/87372.pdf.
aluminium, wrought alloy	Commodity	Aluminium and aluminium products	GLOBAL	Update	kg	19.7633	Smith, Brittany L., Ashok Sekar, Heather Mirletz, Garvin Heath, and Robert Margolis. 2024. An Updated Life Cycle Assessment of Utility-Scale Solar Photovoltaic Systems Installed in the United States. Golden, CO: National Renewable Energy Laboratory. NREL/TP-7A40-87372. https://www.nrel.gov/docs/fy24osti/87372.pdf.
epoxy resin, liquid	Commodity	Plastics; basic	GLOBAL	Update	kg	0.00242101	Smith, Brittany L., Ashok Sekar, Heather Mirletz, Garvin Heath, and Robert Margolis. 2024. An Updated Life Cycle Assessment of Utility-Scale Solar Photovoltaic Systems Installed in the United States. Golden, CO: National Renewable Energy Laboratory. NREL/TP-7A40-87372. https://www.nrel.gov/docs/fy24osti/87372.pdf.
nylon 6	Commodity	Textiles (17)	GLOBAL	Update	kg	0.316213	Smith, Brittany L., Ashok Sekar, Heather Mirletz, Garvin Heath, and Robert Margolis. 2024. An Updated Life Cycle Assessment of Utility-Scale Solar Photovoltaic Systems Installed in the United States. Golden, CO: National Renewable Energy Laboratory. NREL/TP-7A40-87372. https://www.nrel.gov/docs/fy24osti/87372.pdf.
polycarbonate	Commodity	Plastics; basic	GLOBAL	Update	kg	0.00301391	Smith, Brittany L., Ashok Sekar, Heather Mirletz, Garvin Heath, and Robert Margolis. 2024. An Updated Life Cycle Assessment of Utility-Scale Solar Photovoltaic Systems Installed in the United States. Golden, CO: National Renewable Energy Laboratory. NREL/TP-7A40-87372. https://www.nrel.gov/docs/fy24osti/87372.pdf.
polyvinylchloride, bulk polymerised	Commodity	Chemicals nec	GLOBAL	Update	kg	5.43492	Smith, Brittany L., Ashok Sekar, Heather Mirletz, Garvin Heath, and Robert Margolis. 2024. An Updated Life Cycle Assessment of Utility-Scale Solar Photovoltaic Systems Installed in the United States. Golden, CO: National Renewable Energy Laboratory. NREL/TP-7A40-87372. https://www.nrel.gov/docs/fy24osti/87372.pdf.
wire drawing, copper	Commodity	Electrical machinery and apparatus n.e.c. (31)	GLOBAL	Update	kg	19.7633	Smith, Brittany L., Ashok Sekar, Heather Mirletz, Garvin Heath, and Robert Margolis. 2024. An Updated Life Cycle Assessment of Utility-Scale Solar Photovoltaic Systems Installed in the United States. Golden, CO: National Renewable Energy Laboratory. NREL/TP-7A40-87372. https://www.nrel.gov/docs/fy24osti/87372.pdf.
aluminium, wrought alloy	Commodity	Aluminium and aluminium products	GLOBAL	Update	kg	4.13054	Smith, Brittany L., Ashok Sekar, Heather Mirletz, Garvin Heath, and Robert Margolis. 2024. An Updated Life Cycle Assessment of Utility-Scale Solar Photovoltaic Systems Installed in the United States. Golden, CO: National Renewable Energy Laboratory. NREL/TP-7A40-87372. https://www.nrel.gov/docs/fy24osti/87372.pdf.
battery cell, Li-ion, LFP	Commodity	Electrical machinery and apparatus n.e.c. (31)	GLOBAL	Update	kg	0.227278	Smith, Brittany L., Ashok Sekar, Heather Mirletz, Garvin Heath, and Robert Margolis. 2024. An Updated Life Cycle Assessment of Utility-Scale Solar Photovoltaic Systems Installed in the United States. Golden, CO: National Renewable Energy Laboratory. NREL/TP-7A40-87372. https://www.nrel.gov/docs/fy24osti/87372.pdf.
corrugated board box	Commodity	Paper and paper products	GLOBAL	Update	kg	4.23924	Smith, Brittany L., Ashok Sekar, Heather Mirletz, Garvin Heath, and Robert Margolis. 2024. An Updated Life Cycle Assessment of Utility-Scale Solar Photovoltaic Systems Installed in the United States. Golden, CO: National Renewable Energy Laboratory. NREL/TP-7A40-87372. https://www.nrel.gov/docs/fy24osti/87372.pdf.
electric motor, vehicle	Commodity	Electrical machinery and apparatus n.e.c. (31)	GLOBAL	Update	kg	2.79157	Smith, Brittany L., Ashok Sekar, Heather Mirletz, Garvin Heath, and Robert Margolis. 2024. An Updated Life Cycle Assessment of Utility-Scale Solar Photovoltaic Systems Installed in the United States. Golden, CO: National Renewable Energy Laboratory. NREL/TP-7A40-87372. https://www.nrel.gov/docs/fy24osti/87372.pdf.
photovoltaic panel, single-Si wafer	Commodity	Wafer	GLOBAL	Update	m2	0.247042	Smith, Brittany L., Ashok Sekar, Heather Mirletz, Garvin Heath, and Robert Margolis. 2024. An Updated Life Cycle Assessment of Utility-Scale Solar Photovoltaic Systems Installed in the United States. Golden, CO: National Renewable Energy Laboratory. NREL/TP-7A40-87372. https://www.nrel.gov/docs/fy24osti/87372.pdf.
polystyrene, high impact	Commodity	Plastics; basic	GLOBAL	Update	kg	0.0393784	Smith, Brittany L., Ashok Sekar, Heather Mirletz, Garvin Heath, and Robert Margolis. 2024. An Updated Life Cycle Assessment of Utility-Scale Solar Photovoltaic Systems Installed in the United States. Golden, CO: National Renewable Energy Laboratory. NREL/TP-7A40-87372. https://www.nrel.gov/docs/fy24osti/87372.pdf.
section bar extrusion, aluminium	Commodity	Aluminium and aluminium products	GLOBAL	Update	kg	4.13054	Smith, Brittany L., Ashok Sekar, Heather Mirletz, Garvin Heath, and Robert Margolis. 2024. An Updated Life Cycle Assessment of Utility-Scale Solar Photovoltaic Systems Installed in the United States. Golden, CO: National Renewable Energy Laboratory. NREL/TP-7A40-87372. https://www.nrel.gov/docs/fy24osti/87372.pdf.
section bar rolling, steel	Commodity	Basic iron and steel and of ferro-alloys and first products thereof	GLOBAL	Update	kg	466.909	Smith, Brittany L., Ashok Sekar, Heather Mirletz, Garvin Heath, and Robert Margolis. 2024. An Updated Life Cycle Assessment of Utility-Scale Solar Photovoltaic Systems Installed in the United States. Golden, CO: National Renewable Energy Laboratory. NREL/TP-7A40-87372. https://www.nrel.gov/docs/fy24osti/87372.pdf.
section bar rolling, steel	Commodity	Basic iron and steel and of ferro-alloys and first products thereof	GLOBAL	Update	kg	4.13054	Smith, Brittany L., Ashok Sekar, Heather Mirletz, Garvin Heath, and Robert Margolis. 2024. An Updated Life Cycle Assessment of Utility-Scale Solar Photovoltaic Systems Installed in the United States. Golden, CO: National Renewable Energy Laboratory. NREL/TP-7A40-87372. https://www.nrel.gov/docs/fy24osti/87372.pdf.
steel, chromium steel 18/8	Commodity	Basic iron and steel and of ferro-alloys and first products thereof	GLOBAL	Update	kg	4.13054	Smith, Brittany L., Ashok Sekar, Heather Mirletz, Garvin Heath, and Robert Margolis. 2024. An Updated Life Cycle Assessment of Utility-Scale Solar Photovoltaic Systems Installed in the United States. Golden, CO: National Renewable Energy Laboratory. NREL/TP-7A40-87372. https://www.nrel.gov/docs/fy24osti/87372.pdf.
steel, low-alloyed, hot rolled	Commodity	Basic iron and steel and of ferro-alloys and first products thereof	GLOBAL	Update	kg	466.909	Smith, Brittany L., Ashok Sekar, Heather Mirletz, Garvin Heath, and Robert Margolis. 2024. An Updated Life Cycle Assessment of Utility-Scale Solar Photovoltaic Systems Installed in the United States. Golden, CO: National Renewable Energy Laboratory. NREL/TP-7A40-87372. https://www.nrel.gov/docs/fy24osti/87372.pdf.
Employment	Satellite account	Employment	GLOBAL	Update	1000 persons	0.000411111	https://doi.org/10.1016/j.rser.2017.05.039
CO2	Satellite account	Carbon dioxide	GLOBAL	Update	kg	9.51901	Estimation through GHG protocol data, emissions related to the combustion of 19.76 kg of diesel
CH4	Satellite account	CH4	GLOBAL	Update	kg	0.00128462	Estimation through GHG protocol data, emissions related to the combustion of 19.76 kg of diesel
N2O	Satellite account	N2O	GLOBAL	Update	kg	7.7077e-05	Estimation through GHG protocol data, emissions related to the combustion of 19.76 kg of diesel
CO2	Satellite account	Carbon dioxide	GLOBAL	Update	kg	8.65864	Estimation through GHG protocol data, emissions related to the combustion of 0,055 kg of diesel
CH4	Satellite account	CH4	GLOBAL	Update	kg	0.00116851	Estimation through GHG protocol data, emissions related to the combustion of 0,055 kg of diesel
N2O	Satellite account	N2O	GLOBAL	Update	kg	7.01104e-05	Estimation through GHG protocol data, emissions related to the combustion of 0,055 kg of diesel
transport, transoceanic freight ship	Commodity	Sea and coastal water transportation services	GLOBAL	Update	Meuro	0.000322123	Estimation through UN ComTrade data
transport, freight, lorry, fleet average	Commodity	Other land transportation services	GLOBAL	Update	Meuro	2.12543e-05	Estimation through UN ComTrade data
transport, freight, rail	Commodity	Railway transportation services	GLOBAL	Update	Meuro	0.000221696	Estimation through UN ComTrade data
EOL	Commodity	PV end of life management	GLOBAL	Update	m2	50.1495	Smith, Brittany L., Ashok Sekar, Heather Mirletz, Garvin Heath, and Robert Margolis. 2024. An Updated Life Cycle Assessment of Utility-Scale Solar Photovoltaic Systems Installed in the United States. Golden, CO: National Renewable Energy Laboratory. NREL/TP-7A40-87372. https://www.nrel.gov/docs/fy24osti/87372.pdf.

## Sheet: Inventories | PV use APAC
back to ReadMe
Input	Item type	EXIOBASE item	EXIOBASE Region	Change type	Unit	Quantity	Source
PV modules	Commodity	PV modules	GLOBAL	Update	m2	50.1495	Smith, Brittany L., Ashok Sekar, Heather Mirletz, Garvin Heath, and Robert Margolis. 2024. An Updated Life Cycle Assessment of Utility-Scale Solar Photovoltaic Systems Installed in the United States. Golden, CO: National Renewable Energy Laboratory. NREL/TP-7A40-87372. https://www.nrel.gov/docs/fy24osti/87372.pdf.
aluminium, wrought alloy	Commodity	Aluminium and aluminium products	GLOBAL	Update	kg	19.7633	Smith, Brittany L., Ashok Sekar, Heather Mirletz, Garvin Heath, and Robert Margolis. 2024. An Updated Life Cycle Assessment of Utility-Scale Solar Photovoltaic Systems Installed in the United States. Golden, CO: National Renewable Energy Laboratory. NREL/TP-7A40-87372. https://www.nrel.gov/docs/fy24osti/87372.pdf.
epoxy resin, liquid	Commodity	Chemicals nec	GLOBAL	Update	kg	0.00242101	Smith, Brittany L., Ashok Sekar, Heather Mirletz, Garvin Heath, and Robert Margolis. 2024. An Updated Life Cycle Assessment of Utility-Scale Solar Photovoltaic Systems Installed in the United States. Golden, CO: National Renewable Energy Laboratory. NREL/TP-7A40-87372. https://www.nrel.gov/docs/fy24osti/87372.pdf.
nylon 6	Commodity	Chemicals nec	GLOBAL	Update	kg	0.316213	Smith, Brittany L., Ashok Sekar, Heather Mirletz, Garvin Heath, and Robert Margolis. 2024. An Updated Life Cycle Assessment of Utility-Scale Solar Photovoltaic Systems Installed in the United States. Golden, CO: National Renewable Energy Laboratory. NREL/TP-7A40-87372. https://www.nrel.gov/docs/fy24osti/87372.pdf.
polycarbonate	Commodity	Chemicals nec	GLOBAL	Update	kg	0.00301391	Smith, Brittany L., Ashok Sekar, Heather Mirletz, Garvin Heath, and Robert Margolis. 2024. An Updated Life Cycle Assessment of Utility-Scale Solar Photovoltaic Systems Installed in the United States. Golden, CO: National Renewable Energy Laboratory. NREL/TP-7A40-87372. https://www.nrel.gov/docs/fy24osti/87372.pdf.
polyvinylchloride, bulk polymerised	Commodity	Chemicals nec	GLOBAL	Update	kg	5.43492	Smith, Brittany L., Ashok Sekar, Heather Mirletz, Garvin Heath, and Robert Margolis. 2024. An Updated Life Cycle Assessment of Utility-Scale Solar Photovoltaic Systems Installed in the United States. Golden, CO: National Renewable Energy Laboratory. NREL/TP-7A40-87372. https://www.nrel.gov/docs/fy24osti/87372.pdf.
wire drawing, copper	Commodity	Electrical machinery and apparatus n.e.c. (31)	GLOBAL	Update	kg	19.7633	Smith, Brittany L., Ashok Sekar, Heather Mirletz, Garvin Heath, and Robert Margolis. 2024. An Updated Life Cycle Assessment of Utility-Scale Solar Photovoltaic Systems Installed in the United States. Golden, CO: National Renewable Energy Laboratory. NREL/TP-7A40-87372. https://www.nrel.gov/docs/fy24osti/87372.pdf.
diesel, burned in building machine	Commodity	Gas/Diesel Oil	GLOBAL	Update	kg	2.98748	Smith, Brittany L., Ashok Sekar, Heather Mirletz, Garvin Heath, and Robert Margolis. 2024. An Updated Life Cycle Assessment of Utility-Scale Solar Photovoltaic Systems Installed in the United States. Golden, CO: National Renewable Energy Laboratory. NREL/TP-7A40-87372. https://www.nrel.gov/docs/fy24osti/87372.pdf.
electric motor, vehicle	Commodity	Electrical machinery and apparatus n.e.c. (31)	GLOBAL	Update	kg	0.839942	Smith, Brittany L., Ashok Sekar, Heather Mirletz, Garvin Heath, and Robert Margolis. 2024. An Updated Life Cycle Assessment of Utility-Scale Solar Photovoltaic Systems Installed in the United States. Golden, CO: National Renewable Energy Laboratory. NREL/TP-7A40-87372. https://www.nrel.gov/docs/fy24osti/87372.pdf.
petrol, low-sulfur	Commodity	Gas/Diesel Oil	GLOBAL	Update	kg	2.71746	Smith, Brittany L., Ashok Sekar, Heather Mirletz, Garvin Heath, and Robert Margolis. 2024. An Updated Life Cycle Assessment of Utility-Scale Solar Photovoltaic Systems Installed in the United States. Golden, CO: National Renewable Energy Laboratory. NREL/TP-7A40-87372. https://www.nrel.gov/docs/fy24osti/87372.pdf.
concrete slab	Commodity	Other non-metallic mineral products	GLOBAL	Update	kg	7.13958	Smith, Brittany L., Ashok Sekar, Heather Mirletz, Garvin Heath, and Robert Margolis. 2024. An Updated Life Cycle Assessment of Utility-Scale Solar Photovoltaic Systems Installed in the United States. Golden, CO: National Renewable Energy Laboratory. NREL/TP-7A40-87372. https://www.nrel.gov/docs/fy24osti/87372.pdf.
copper, cathode	Commodity	Copper products	GLOBAL	Update	kg	16.0192	Smith, Brittany L., Ashok Sekar, Heather Mirletz, Garvin Heath, and Robert Margolis. 2024. An Updated Life Cycle Assessment of Utility-Scale Solar Photovoltaic Systems Installed in the United States. Golden, CO: National Renewable Energy Laboratory. NREL/TP-7A40-87372. https://www.nrel.gov/docs/fy24osti/87372.pdf.
epoxy resin, liquid	Commodity	Plastics; basic	GLOBAL	Update	kg	2.90002	Smith, Brittany L., Ashok Sekar, Heather Mirletz, Garvin Heath, and Robert Margolis. 2024. An Updated Life Cycle Assessment of Utility-Scale Solar Photovoltaic Systems Installed in the United States. Golden, CO: National Renewable Energy Laboratory. NREL/TP-7A40-87372. https://www.nrel.gov/docs/fy24osti/87372.pdf.
ferrite	Commodity	Ceramic goods	GLOBAL	Update	kg	65.1815	Smith, Brittany L., Ashok Sekar, Heather Mirletz, Garvin Heath, and Robert Margolis. 2024. An Updated Life Cycle Assessment of Utility-Scale Solar Photovoltaic Systems Installed in the United States. Golden, CO: National Renewable Energy Laboratory. NREL/TP-7A40-87372. https://www.nrel.gov/docs/fy24osti/87372.pdf.
injection moulding	Commodity	Fabricated metal products; except machinery and equipment (28)	GLOBAL	Update	kg	2.90002	Smith, Brittany L., Ashok Sekar, Heather Mirletz, Garvin Heath, and Robert Margolis. 2024. An Updated Life Cycle Assessment of Utility-Scale Solar Photovoltaic Systems Installed in the United States. Golden, CO: National Renewable Energy Laboratory. NREL/TP-7A40-87372. https://www.nrel.gov/docs/fy24osti/87372.pdf.
lubricating oil	Commodity	Lubricants	GLOBAL	Update	kg	58.0005	Smith, Brittany L., Ashok Sekar, Heather Mirletz, Garvin Heath, and Robert Margolis. 2024. An Updated Life Cycle Assessment of Utility-Scale Solar Photovoltaic Systems Installed in the United States. Golden, CO: National Renewable Energy Laboratory. NREL/TP-7A40-87372. https://www.nrel.gov/docs/fy24osti/87372.pdf.
reinforcing steel	Commodity	Basic iron and steel and of ferro-alloys and first products thereof	GLOBAL	Update	kg	5.52385	Smith, Brittany L., Ashok Sekar, Heather Mirletz, Garvin Heath, and Robert Margolis. 2024. An Updated Life Cycle Assessment of Utility-Scale Solar Photovoltaic Systems Installed in the United States. Golden, CO: National Renewable Energy Laboratory. NREL/TP-7A40-87372. https://www.nrel.gov/docs/fy24osti/87372.pdf.
wire drawing, copper	Commodity	Electrical machinery and apparatus n.e.c. (31)	GLOBAL	Update	kg	16.0192	Smith, Brittany L., Ashok Sekar, Heather Mirletz, Garvin Heath, and Robert Margolis. 2024. An Updated Life Cycle Assessment of Utility-Scale Solar Photovoltaic Systems Installed in the United States. Golden, CO: National Renewable Energy Laboratory. NREL/TP-7A40-87372. https://www.nrel.gov/docs/fy24osti/87372.pdf.
aluminium, wrought alloy	Commodity	Aluminium and aluminium products	GLOBAL	Update	kg	0.220954	Smith, Brittany L., Ashok Sekar, Heather Mirletz, Garvin Heath, and Robert Margolis. 2024. An Updated Life Cycle Assessment of Utility-Scale Solar Photovoltaic Systems Installed in the United States. Golden, CO: National Renewable Energy Laboratory. NREL/TP-7A40-87372. https://www.nrel.gov/docs/fy24osti/87372.pdf.
cable, network cable, category 5, without plugs	Commodity	Electrical machinery and apparatus n.e.c. (31)	GLOBAL	Update	kg	0.0908674	Smith, Brittany L., Ashok Sekar, Heather Mirletz, Garvin Heath, and Robert Margolis. 2024. An Updated Life Cycle Assessment of Utility-Scale Solar Photovoltaic Systems Installed in the United States. Golden, CO: National Renewable Energy Laboratory. NREL/TP-7A40-87372. https://www.nrel.gov/docs/fy24osti/87372.pdf.
cable, three-conductor cable	Commodity	Electrical machinery and apparatus n.e.c. (31)	GLOBAL	Update	kg	0.175217	Smith, Brittany L., Ashok Sekar, Heather Mirletz, Garvin Heath, and Robert Margolis. 2024. An Updated Life Cycle Assessment of Utility-Scale Solar Photovoltaic Systems Installed in the United States. Golden, CO: National Renewable Energy Laboratory. NREL/TP-7A40-87372. https://www.nrel.gov/docs/fy24osti/87372.pdf.
capacitor, electrolyte type, >2 cm height	Commodity	Electrical machinery and apparatus n.e.c. (31)	GLOBAL	Update	kg	0.0138096	Smith, Brittany L., Ashok Sekar, Heather Mirletz, Garvin Heath, and Robert Margolis. 2024. An Updated Life Cycle Assessment of Utility-Scale Solar Photovoltaic Systems Installed in the United States. Golden, CO: National Renewable Energy Laboratory. NREL/TP-7A40-87372. https://www.nrel.gov/docs/fy24osti/87372.pdf.
capacitor, film type, for through-hole mounting	Commodity	Electrical machinery and apparatus n.e.c. (31)	GLOBAL	Update	kg	0.138096	Smith, Brittany L., Ashok Sekar, Heather Mirletz, Garvin Heath, and Robert Margolis. 2024. An Updated Life Cycle Assessment of Utility-Scale Solar Photovoltaic Systems Installed in the United States. Golden, CO: National Renewable Energy Laboratory. NREL/TP-7A40-87372. https://www.nrel.gov/docs/fy24osti/87372.pdf.
concrete slab	Commodity	Other non-metallic mineral products	GLOBAL	Update	kg	7.13958	Smith, Brittany L., Ashok Sekar, Heather Mirletz, Garvin Heath, and Robert Margolis. 2024. An Updated Life Cycle Assessment of Utility-Scale Solar Photovoltaic Systems Installed in the United States. Golden, CO: National Renewable Energy Laboratory. NREL/TP-7A40-87372. https://www.nrel.gov/docs/fy24osti/87372.pdf.
copper, cathode	Commodity	Copper products	GLOBAL	Update	kg	1.18763	Smith, Brittany L., Ashok Sekar, Heather Mirletz, Garvin Heath, and Robert Margolis. 2024. An Updated Life Cycle Assessment of Utility-Scale Solar Photovoltaic Systems Installed in the United States. Golden, CO: National Renewable Energy Laboratory. NREL/TP-7A40-87372. https://www.nrel.gov/docs/fy24osti/87372.pdf.
glass fibre reinforced plastic, polyamide, injection moulded	Commodity	Glass and glass products	GLOBAL	Update	kg	0.0828578	Smith, Brittany L., Ashok Sekar, Heather Mirletz, Garvin Heath, and Robert Margolis. 2024. An Updated Life Cycle Assessment of Utility-Scale Solar Photovoltaic Systems Installed in the United States. Golden, CO: National Renewable Energy Laboratory. NREL/TP-7A40-87372. https://www.nrel.gov/docs/fy24osti/87372.pdf.
inductor, ring core choke type	Commodity	Electrical machinery and apparatus n.e.c. (31)	GLOBAL	Update	kg	1.79525	Smith, Brittany L., Ashok Sekar, Heather Mirletz, Garvin Heath, and Robert Margolis. 2024. An Updated Life Cycle Assessment of Utility-Scale Solar Photovoltaic Systems Installed in the United States. Golden, CO: National Renewable Energy Laboratory. NREL/TP-7A40-87372. https://www.nrel.gov/docs/fy24osti/87372.pdf.
integrated circuit, logic type	Commodity	Electrical machinery and apparatus n.e.c. (31)	GLOBAL	Update	kg	0.000552385	Smith, Brittany L., Ashok Sekar, Heather Mirletz, Garvin Heath, and Robert Margolis. 2024. An Updated Life Cycle Assessment of Utility-Scale Solar Photovoltaic Systems Installed in the United States. Golden, CO: National Renewable Energy Laboratory. NREL/TP-7A40-87372. https://www.nrel.gov/docs/fy24osti/87372.pdf.
lubricating oil	Commodity	Lubricants	GLOBAL	Update	kg	0.00276193	Smith, Brittany L., Ashok Sekar, Heather Mirletz, Garvin Heath, and Robert Margolis. 2024. An Updated Life Cycle Assessment of Utility-Scale Solar Photovoltaic Systems Installed in the United States. Golden, CO: National Renewable Energy Laboratory. NREL/TP-7A40-87372. https://www.nrel.gov/docs/fy24osti/87372.pdf.
printed wiring board, through- hole mounted, unspecified, Pb free	Commodity	Electrical machinery and apparatus n.e.c. (31)	GLOBAL	Update	kg	0.00828578	Smith, Brittany L., Ashok Sekar, Heather Mirletz, Garvin Heath, and Robert Margolis. 2024. An Updated Life Cycle Assessment of Utility-Scale Solar Photovoltaic Systems Installed in the United States. Golden, CO: National Renewable Energy Laboratory. NREL/TP-7A40-87372. https://www.nrel.gov/docs/fy24osti/87372.pdf.
reinforcing steel	Commodity	Basic iron and steel and of ferro-alloys and first products thereof	GLOBAL	Update	kg	3.31431	Smith, Brittany L., Ashok Sekar, Heather Mirletz, Garvin Heath, and Robert Margolis. 2024. An Updated Life Cycle Assessment of Utility-Scale Solar Photovoltaic Systems Installed in the United States. Golden, CO: National Renewable Energy Laboratory. NREL/TP-7A40-87372. https://www.nrel.gov/docs/fy24osti/87372.pdf.
transformer, high voltage use	Commodity	Electrical machinery and apparatus n.e.c. (31)	GLOBAL	Update	kg	0.276193	Smith, Brittany L., Ashok Sekar, Heather Mirletz, Garvin Heath, and Robert Margolis. 2024. An Updated Life Cycle Assessment of Utility-Scale Solar Photovoltaic Systems Installed in the United States. Golden, CO: National Renewable Energy Laboratory. NREL/TP-7A40-87372. https://www.nrel.gov/docs/fy24osti/87372.pdf.
transistor, wired, big size, through-hole mounting	Commodity	Electrical machinery and apparatus n.e.c. (31)	GLOBAL	Update	kg	0.000828578	Smith, Brittany L., Ashok Sekar, Heather Mirletz, Garvin Heath, and Robert Margolis. 2024. An Updated Life Cycle Assessment of Utility-Scale Solar Photovoltaic Systems Installed in the United States. Golden, CO: National Renewable Energy Laboratory. NREL/TP-7A40-87372. https://www.nrel.gov/docs/fy24osti/87372.pdf.
fan, for power supply unit, desktop computer	Commodity	Electrical machinery and apparatus n.e.c. (31)	GLOBAL	Update	kg	0.000552385	Smith, Brittany L., Ashok Sekar, Heather Mirletz, Garvin Heath, and Robert Margolis. 2024. An Updated Life Cycle Assessment of Utility-Scale Solar Photovoltaic Systems Installed in the United States. Golden, CO: National Renewable Energy Laboratory. NREL/TP-7A40-87372. https://www.nrel.gov/docs/fy24osti/87372.pdf.
aluminium, wrought alloy	Commodity	Aluminium and aluminium products	GLOBAL	Update	kg	19.7633	Smith, Brittany L., Ashok Sekar, Heather Mirletz, Garvin Heath, and Robert Margolis. 2024. An Updated Life Cycle Assessment of Utility-Scale Solar Photovoltaic Systems Installed in the United States. Golden, CO: National Renewable Energy Laboratory. NREL/TP-7A40-87372. https://www.nrel.gov/docs/fy24osti/87372.pdf.
epoxy resin, liquid	Commodity	Plastics; basic	GLOBAL	Update	kg	0.00242101	Smith, Brittany L., Ashok Sekar, Heather Mirletz, Garvin Heath, and Robert Margolis. 2024. An Updated Life Cycle Assessment of Utility-Scale Solar Photovoltaic Systems Installed in the United States. Golden, CO: National Renewable Energy Laboratory. NREL/TP-7A40-87372. https://www.nrel.gov/docs/fy24osti/87372.pdf.
nylon 6	Commodity	Textiles (17)	GLOBAL	Update	kg	0.316213	Smith, Brittany L., Ashok Sekar, Heather Mirletz, Garvin Heath, and Robert Margolis. 2024. An Updated Life Cycle Assessment of Utility-Scale Solar Photovoltaic Systems Installed in the United States. Golden, CO: National Renewable Energy Laboratory. NREL/TP-7A40-87372. https://www.nrel.gov/docs/fy24osti/87372.pdf.
polycarbonate	Commodity	Plastics; basic	GLOBAL	Update	kg	0.00301391	Smith, Brittany L., Ashok Sekar, Heather Mirletz, Garvin Heath, and Robert Margolis. 2024. An Updated Life Cycle Assessment of Utility-Scale Solar Photovoltaic Systems Installed in the United States. Golden, CO: National Renewable Energy Laboratory. NREL/TP-7A40-87372. https://www.nrel.gov/docs/fy24osti/87372.pdf.
polyvinylchloride, bulk polymerised	Commodity	Chemicals nec	GLOBAL	Update	kg	5.43492	Smith, Brittany L., Ashok Sekar, Heather Mirletz, Garvin Heath, and Robert Margolis. 2024. An Updated Life Cycle Assessment of Utility-Scale Solar Photovoltaic Systems Installed in the United States. Golden, CO: National Renewable Energy Laboratory. NREL/TP-7A40-87372. https://www.nrel.gov/docs/fy24osti/87372.pdf.
wire drawing, copper	Commodity	Electrical machinery and apparatus n.e.c. (31)	GLOBAL	Update	kg	19.7633	Smith, Brittany L., Ashok Sekar, Heather Mirletz, Garvin Heath, and Robert Margolis. 2024. An Updated Life Cycle Assessment of Utility-Scale Solar Photovoltaic Systems Installed in the United States. Golden, CO: National Renewable Energy Laboratory. NREL/TP-7A40-87372. https://www.nrel.gov/docs/fy24osti/87372.pdf.
aluminium, wrought alloy	Commodity	Aluminium and aluminium products	GLOBAL	Update	kg	4.13054	Smith, Brittany L., Ashok Sekar, Heather Mirletz, Garvin Heath, and Robert Margolis. 2024. An Updated Life Cycle Assessment of Utility-Scale Solar Photovoltaic Systems Installed in the United States. Golden, CO: National Renewable Energy Laboratory. NREL/TP-7A40-87372. https://www.nrel.gov/docs/fy24osti/87372.pdf.
battery cell, Li-ion, LFP	Commodity	Electrical machinery and apparatus n.e.c. (31)	GLOBAL	Update	kg	0.227278	Smith, Brittany L., Ashok Sekar, Heather Mirletz, Garvin Heath, and Robert Margolis. 2024. An Updated Life Cycle Assessment of Utility-Scale Solar Photovoltaic Systems Installed in the United States. Golden, CO: National Renewable Energy Laboratory. NREL/TP-7A40-87372. https://www.nrel.gov/docs/fy24osti/87372.pdf.
corrugated board box	Commodity	Paper and paper products	GLOBAL	Update	kg	4.23924	Smith, Brittany L., Ashok Sekar, Heather Mirletz, Garvin Heath, and Robert Margolis. 2024. An Updated Life Cycle Assessment of Utility-Scale Solar Photovoltaic Systems Installed in the United States. Golden, CO: National Renewable Energy Laboratory. NREL/TP-7A40-87372. https://www.nrel.gov/docs/fy24osti/87372.pdf.
electric motor, vehicle	Commodity	Electrical machinery and apparatus n.e.c. (31)	GLOBAL	Update	kg	2.79157	Smith, Brittany L., Ashok Sekar, Heather Mirletz, Garvin Heath, and Robert Margolis. 2024. An Updated Life Cycle Assessment of Utility-Scale Solar Photovoltaic Systems Installed in the United States. Golden, CO: National Renewable Energy Laboratory. NREL/TP-7A40-87372. https://www.nrel.gov/docs/fy24osti/87372.pdf.
photovoltaic panel, single-Si wafer	Commodity	Wafer	GLOBAL	Update	m2	0.247042	Smith, Brittany L., Ashok Sekar, Heather Mirletz, Garvin Heath, and Robert Margolis. 2024. An Updated Life Cycle Assessment of Utility-Scale Solar Photovoltaic Systems Installed in the United States. Golden, CO: National Renewable Energy Laboratory. NREL/TP-7A40-87372. https://www.nrel.gov/docs/fy24osti/87372.pdf.
polystyrene, high impact	Commodity	Plastics; basic	GLOBAL	Update	kg	0.0393784	Smith, Brittany L., Ashok Sekar, Heather Mirletz, Garvin Heath, and Robert Margolis. 2024. An Updated Life Cycle Assessment of Utility-Scale Solar Photovoltaic Systems Installed in the United States. Golden, CO: National Renewable Energy Laboratory. NREL/TP-7A40-87372. https://www.nrel.gov/docs/fy24osti/87372.pdf.
section bar extrusion, aluminium	Commodity	Aluminium and aluminium products	GLOBAL	Update	kg	4.13054	Smith, Brittany L., Ashok Sekar, Heather Mirletz, Garvin Heath, and Robert Margolis. 2024. An Updated Life Cycle Assessment of Utility-Scale Solar Photovoltaic Systems Installed in the United States. Golden, CO: National Renewable Energy Laboratory. NREL/TP-7A40-87372. https://www.nrel.gov/docs/fy24osti/87372.pdf.
section bar rolling, steel	Commodity	Basic iron and steel and of ferro-alloys and first products thereof	GLOBAL	Update	kg	466.909	Smith, Brittany L., Ashok Sekar, Heather Mirletz, Garvin Heath, and Robert Margolis. 2024. An Updated Life Cycle Assessment of Utility-Scale Solar Photovoltaic Systems Installed in the United States. Golden, CO: National Renewable Energy Laboratory. NREL/TP-7A40-87372. https://www.nrel.gov/docs/fy24osti/87372.pdf.
section bar rolling, steel	Commodity	Basic iron and steel and of ferro-alloys and first products thereof	GLOBAL	Update	kg	4.13054	Smith, Brittany L., Ashok Sekar, Heather Mirletz, Garvin Heath, and Robert Margolis. 2024. An Updated Life Cycle Assessment of Utility-Scale Solar Photovoltaic Systems Installed in the United States. Golden, CO: National Renewable Energy Laboratory. NREL/TP-7A40-87372. https://www.nrel.gov/docs/fy24osti/87372.pdf.
steel, chromium steel 18/8	Commodity	Basic iron and steel and of ferro-alloys and first products thereof	GLOBAL	Update	kg	4.13054	Smith, Brittany L., Ashok Sekar, Heather Mirletz, Garvin Heath, and Robert Margolis. 2024. An Updated Life Cycle Assessment of Utility-Scale Solar Photovoltaic Systems Installed in the United States. Golden, CO: National Renewable Energy Laboratory. NREL/TP-7A40-87372. https://www.nrel.gov/docs/fy24osti/87372.pdf.
steel, low-alloyed, hot rolled	Commodity	Basic iron and steel and of ferro-alloys and first products thereof	GLOBAL	Update	kg	466.909	Smith, Brittany L., Ashok Sekar, Heather Mirletz, Garvin Heath, and Robert Margolis. 2024. An Updated Life Cycle Assessment of Utility-Scale Solar Photovoltaic Systems Installed in the United States. Golden, CO: National Renewable Energy Laboratory. NREL/TP-7A40-87372. https://www.nrel.gov/docs/fy24osti/87372.pdf.
Employment	Satellite account	Employment	GLOBAL	Update	1000 persons	0.000411111	https://doi.org/10.1016/j.rser.2017.05.039
CO2	Satellite account	Carbon dioxide	GLOBAL	Update	kg	9.51901	Estimation through GHG protocol data, emissions related to the combustion of 19.76 kg of diesel
CH4	Satellite account	CH4	GLOBAL	Update	kg	0.00128462	Estimation through GHG protocol data, emissions related to the combustion of 19.76 kg of diesel
N2O	Satellite account	N2O	GLOBAL	Update	kg	7.7077e-05	Estimation through GHG protocol data, emissions related to the combustion of 19.76 kg of diesel
CO2	Satellite account	Carbon dioxide	GLOBAL	Update	kg	8.65864	Estimation through GHG protocol data, emissions related to the combustion of 0,055 kg of diesel
CH4	Satellite account	CH4	GLOBAL	Update	kg	0.00116851	Estimation through GHG protocol data, emissions related to the combustion of 0,055 kg of diesel
N2O	Satellite account	N2O	GLOBAL	Update	kg	7.01104e-05	Estimation through GHG protocol data, emissions related to the combustion of 0,055 kg of diesel
transport, transoceanic freight ship	Commodity	Sea and coastal water transportation services	GLOBAL	Update	Meuro	1.17815e-05	Estimation through UN ComTrade data
transport, freight, lorry, fleet average	Commodity	Other land transportation services	GLOBAL	Update	Meuro	2.12543e-05	Estimation through UN ComTrade data
transport, freight, rail	Commodity	Railway transportation services	GLOBAL	Update	Meuro	0.000221696	Estimation through UN ComTrade data
EOL	Commodity	PV end of life management	GLOBAL	Update	m2	50.1495	Smith, Brittany L., Ashok Sekar, Heather Mirletz, Garvin Heath, and Robert Margolis. 2024. An Updated Life Cycle Assessment of Utility-Scale Solar Photovoltaic Systems Installed in the United States. Golden, CO: National Renewable Energy Laboratory. NREL/TP-7A40-87372. https://www.nrel.gov/docs/fy24osti/87372.pdf.

## Sheet: Inventories | PV prod CN
back to ReadMe
Input	Item type	EXIOBASE item	EXIOBASE Region	Change type	Unit	Quantity	Source
photovoltaic cell, single-Si, at plant	Commodity	Cells	GLOBAL	Update	m2	0.935415	R. Frischknecht, P. Stolz, L. Krebs, M. de Wild-Scholten, P. Sinha, V. Fthenakis, H. C. Kim, M. Raugei, M. Stucki, 2020, Life Cycle Inventories and Life Cycle Assessment of Photovoltaic Systems, International Energy Agency (IEA) PVPS Task 12, Report T12-1
aluminium alloy, AlMg3, at plant	Commodity	Aluminium and aluminium products	GLOBAL	Update	kg	2.125	R. Frischknecht, P. Stolz, L. Krebs, M. de Wild-Scholten, P. Sinha, V. Fthenakis, H. C. Kim, M. Raugei, M. Stucki, 2020, Life Cycle Inventories and Life Cycle Assessment of Photovoltaic Systems, International Energy Agency (IEA) PVPS Task 12, Report T12-1
copper, at regional storage	Commodity	Copper products	GLOBAL	Update	kg	0.1025	R. Frischknecht, P. Stolz, L. Krebs, M. de Wild-Scholten, P. Sinha, V. Fthenakis, H. C. Kim, M. Raugei, M. Stucki, 2020, Life Cycle Inventories and Life Cycle Assessment of Photovoltaic Systems, International Energy Agency (IEA) PVPS Task 12, Report T12-1
wire drawing, copper	Commodity	Electrical machinery and apparatus n.e.c. (31)	GLOBAL	Update	kg	0.1025	R. Frischknecht, P. Stolz, L. Krebs, M. de Wild-Scholten, P. Sinha, V. Fthenakis, H. C. Kim, M. Raugei, M. Stucki, 2020, Life Cycle Inventories and Life Cycle Assessment of Photovoltaic Systems, International Energy Agency (IEA) PVPS Task 12, Report T12-1
diode, unspecified, at plant	Commodity	Electrical machinery and apparatus n.e.c. (31)	GLOBAL	Update	kg	0.0028125	R. Frischknecht, P. Stolz, L. Krebs, M. de Wild-Scholten, P. Sinha, V. Fthenakis, H. C. Kim, M. Raugei, M. Stucki, 2020, Life Cycle Inventories and Life Cycle Assessment of Photovoltaic Systems, International Energy Agency (IEA) PVPS Task 12, Report T12-1
silicone product, at plant	Commodity	Plastics; basic	GLOBAL	Update	kg	0.121875	R. Frischknecht, P. Stolz, L. Krebs, M. de Wild-Scholten, P. Sinha, V. Fthenakis, H. C. Kim, M. Raugei, M. Stucki, 2020, Life Cycle Inventories and Life Cycle Assessment of Photovoltaic Systems, International Energy Agency (IEA) PVPS Task 12, Report T12-1
tin, at regional storage	Commodity	Lead; zinc and tin and products thereof	GLOBAL	Update	kg	0.012875	R. Frischknecht, P. Stolz, L. Krebs, M. de Wild-Scholten, P. Sinha, V. Fthenakis, H. C. Kim, M. Raugei, M. Stucki, 2020, Life Cycle Inventories and Life Cycle Assessment of Photovoltaic Systems, International Energy Agency (IEA) PVPS Task 12, Report T12-1
lead, at regional storage	Commodity	Lead; zinc and tin and products thereof	GLOBAL	Update	kg	0.000725	R. Frischknecht, P. Stolz, L. Krebs, M. de Wild-Scholten, P. Sinha, V. Fthenakis, H. C. Kim, M. Raugei, M. Stucki, 2020, Life Cycle Inventories and Life Cycle Assessment of Photovoltaic Systems, International Energy Agency (IEA) PVPS Task 12, Report T12-1
solar glass, low-iron, at regional storage	Commodity	Glass and glass products	GLOBAL	Update	kg	8.8125	R. Frischknecht, P. Stolz, L. Krebs, M. de Wild-Scholten, P. Sinha, V. Fthenakis, H. C. Kim, M. Raugei, M. Stucki, 2020, Life Cycle Inventories and Life Cycle Assessment of Photovoltaic Systems, International Energy Agency (IEA) PVPS Task 12, Report T12-1
tempering, flat glass	Commodity	Glass and glass products	GLOBAL	Update	kg	8.8125	R. Frischknecht, P. Stolz, L. Krebs, M. de Wild-Scholten, P. Sinha, V. Fthenakis, H. C. Kim, M. Raugei, M. Stucki, 2020, Life Cycle Inventories and Life Cycle Assessment of Photovoltaic Systems, International Energy Agency (IEA) PVPS Task 12, Report T12-1
glass fibre reinforced plastic, polyamide, injection moulding, at plant	Commodity	Plastics; basic	GLOBAL	Update	kg	0.295	R. Frischknecht, P. Stolz, L. Krebs, M. de Wild-Scholten, P. Sinha, V. Fthenakis, H. C. Kim, M. Raugei, M. Stucki, 2020, Life Cycle Inventories and Life Cycle Assessment of Photovoltaic Systems, International Energy Agency (IEA) PVPS Task 12, Report T12-1
polyethylene terephthalate, granulate, amorphous, at plant	Commodity	Plastics; basic	GLOBAL	Update	kg	0.345625	R. Frischknecht, P. Stolz, L. Krebs, M. de Wild-Scholten, P. Sinha, V. Fthenakis, H. C. Kim, M. Raugei, M. Stucki, 2020, Life Cycle Inventories and Life Cycle Assessment of Photovoltaic Systems, International Energy Agency (IEA) PVPS Task 12, Report T12-1
polyethylene, HDPE, granulate, at plant	Commodity	Plastics; basic	GLOBAL	Update	kg	0.02375	R. Frischknecht, P. Stolz, L. Krebs, M. de Wild-Scholten, P. Sinha, V. Fthenakis, H. C. Kim, M. Raugei, M. Stucki, 2020, Life Cycle Inventories and Life Cycle Assessment of Photovoltaic Systems, International Energy Agency (IEA) PVPS Task 12, Report T12-1
ethylvinylacetate, foil, at plant	Commodity	Plastics; basic	GLOBAL	Update	kg	0.875	R. Frischknecht, P. Stolz, L. Krebs, M. de Wild-Scholten, P. Sinha, V. Fthenakis, H. C. Kim, M. Raugei, M. Stucki, 2020, Life Cycle Inventories and Life Cycle Assessment of Photovoltaic Systems, International Energy Agency (IEA) PVPS Task 12, Report T12-1
polyvinylfluoride film, at plant	Commodity	Polyvinylfluoride film	GLOBAL	Update	kg	0.111875	R. Frischknecht, P. Stolz, L. Krebs, M. de Wild-Scholten, P. Sinha, V. Fthenakis, H. C. Kim, M. Raugei, M. Stucki, 2020, Life Cycle Inventories and Life Cycle Assessment of Photovoltaic Systems, International Energy Agency (IEA) PVPS Task 12, Report T12-1
tap water, water balance according to MoeK 2013, at user	Commodity	Collected and purified water; distribution services of water (41)	GLOBAL	Update	Meuro	1.16626e-08	R. Frischknecht, P. Stolz, L. Krebs, M. de Wild-Scholten, P. Sinha, V. Fthenakis, H. C. Kim, M. Raugei, M. Stucki, 2020, Life Cycle Inventories and Life Cycle Assessment of Photovoltaic Systems, International Energy Agency (IEA) PVPS Task 12, Report T12-1
hydrogen fluoride, at plant	Commodity	Hydrogen fluoride	GLOBAL	Update	kg	0.062375	R. Frischknecht, P. Stolz, L. Krebs, M. de Wild-Scholten, P. Sinha, V. Fthenakis, H. C. Kim, M. Raugei, M. Stucki, 2020, Life Cycle Inventories and Life Cycle Assessment of Photovoltaic Systems, International Energy Agency (IEA) PVPS Task 12, Report T12-1
1-propanol, at plant	Commodity	Chemicals nec	GLOBAL	Update	kg	0.015875	R. Frischknecht, P. Stolz, L. Krebs, M. de Wild-Scholten, P. Sinha, V. Fthenakis, H. C. Kim, M. Raugei, M. Stucki, 2020, Life Cycle Inventories and Life Cycle Assessment of Photovoltaic Systems, International Energy Agency (IEA) PVPS Task 12, Report T12-1
isopropanol, at plant	Commodity	Chemicals nec	GLOBAL	Update	kg	0.000146875	R. Frischknecht, P. Stolz, L. Krebs, M. de Wild-Scholten, P. Sinha, V. Fthenakis, H. C. Kim, M. Raugei, M. Stucki, 2020, Life Cycle Inventories and Life Cycle Assessment of Photovoltaic Systems, International Energy Agency (IEA) PVPS Task 12, Report T12-1
potassium hydroxide, at regional storage	Commodity	Chemicals nec	GLOBAL	Update	kg	0.0514375	R. Frischknecht, P. Stolz, L. Krebs, M. de Wild-Scholten, P. Sinha, V. Fthenakis, H. C. Kim, M. Raugei, M. Stucki, 2020, Life Cycle Inventories and Life Cycle Assessment of Photovoltaic Systems, International Energy Agency (IEA) PVPS Task 12, Report T12-1
soap, at plant	Commodity	Chemicals nec	GLOBAL	Update	kg	0.0115625	R. Frischknecht, P. Stolz, L. Krebs, M. de Wild-Scholten, P. Sinha, V. Fthenakis, H. C. Kim, M. Raugei, M. Stucki, 2020, Life Cycle Inventories and Life Cycle Assessment of Photovoltaic Systems, International Energy Agency (IEA) PVPS Task 12, Report T12-1
corrugated board, mixed fibre, single wall, at plant	Commodity	Paper and paper products	GLOBAL	Update	kg	0.7625	R. Frischknecht, P. Stolz, L. Krebs, M. de Wild-Scholten, P. Sinha, V. Fthenakis, H. C. Kim, M. Raugei, M. Stucki, 2020, Life Cycle Inventories and Life Cycle Assessment of Photovoltaic Systems, International Energy Agency (IEA) PVPS Task 12, Report T12-1
EUR-flat pallet	Commodity	Wood and products of wood and cork (except furniture); articles of straw and plaiting materials (20)	GLOBAL	Update	kg	1.25	R. Frischknecht, P. Stolz, L. Krebs, M. de Wild-Scholten, P. Sinha, V. Fthenakis, H. C. Kim, M. Raugei, M. Stucki, 2020, Life Cycle Inventories and Life Cycle Assessment of Photovoltaic Systems, International Energy Agency (IEA) PVPS Task 12, Report T12-1
electricity, medium voltage, at grid	Commodity	Electricity	GLOBAL	Update	kWh	13.9754	R. Frischknecht, P. Stolz, L. Krebs, M. de Wild-Scholten, P. Sinha, V. Fthenakis, H. C. Kim, M. Raugei, M. Stucki, 2020, Life Cycle Inventories and Life Cycle Assessment of Photovoltaic Systems, International Energy Agency (IEA) PVPS Task 12, Report T12-1
diesel, burned in building machine, average	Commodity	Gas/Diesel Oil	GLOBAL	Update	kg	0.000203488	R. Frischknecht, P. Stolz, L. Krebs, M. de Wild-Scholten, P. Sinha, V. Fthenakis, H. C. Kim, M. Raugei, M. Stucki, 2020, Life Cycle Inventories and Life Cycle Assessment of Photovoltaic Systems, International Energy Agency (IEA) PVPS Task 12, Report T12-1
transport, transoceanic freight ship	Commodity	Sea and coastal water transportation services	GLOBAL	Update	Meuro	0	Estimation through UN ComTrade data
transport, freight, lorry, fleet average	Commodity	Other land transportation services	GLOBAL	Update	Meuro	2.81941e-06	Estimation through UN ComTrade data
transport, freight, rail	Commodity	Railway transportation services	GLOBAL	Update	Meuro	2.86716e-07	Estimation through UN ComTrade data
disposal, municipal solid waste, 22.9% water, to municipal incineration	Commodity	Intert/metal waste for treatment: incineration	GLOBAL	Update	tonnes (service)	3e-05	R. Frischknecht, P. Stolz, L. Krebs, M. de Wild-Scholten, P. Sinha, V. Fthenakis, H. C. Kim, M. Raugei, M. Stucki, 2020, Life Cycle Inventories and Life Cycle Assessment of Photovoltaic Systems, International Energy Agency (IEA) PVPS Task 12, Report T12-1
disposal, polyvinylfluoride, 0.2% water, to municipal incineration	Commodity	Intert/metal waste for treatment: incineration	GLOBAL	Update	tonnes (service)	4.29375e-06	R. Frischknecht, P. Stolz, L. Krebs, M. de Wild-Scholten, P. Sinha, V. Fthenakis, H. C. Kim, M. Raugei, M. Stucki, 2020, Life Cycle Inventories and Life Cycle Assessment of Photovoltaic Systems, International Energy Agency (IEA) PVPS Task 12, Report T12-1
disposal, plastics, mixture, 15.3% water, to municipal incineration	Commodity	Plastic waste for treatment: incineration	GLOBAL	Update	tonnes (service)	2.80625e-05	R. Frischknecht, P. Stolz, L. Krebs, M. de Wild-Scholten, P. Sinha, V. Fthenakis, H. C. Kim, M. Raugei, M. Stucki, 2020, Life Cycle Inventories and Life Cycle Assessment of Photovoltaic Systems, International Energy Agency (IEA) PVPS Task 12, Report T12-1
disposal, used mineral oil, 10% water, to hazardous waste incineration	Commodity	Oil/hazardous waste for treatment: incineration	GLOBAL	Update	tonnes (service)	1.60625e-06	R. Frischknecht, P. Stolz, L. Krebs, M. de Wild-Scholten, P. Sinha, V. Fthenakis, H. C. Kim, M. Raugei, M. Stucki, 2020, Life Cycle Inventories and Life Cycle Assessment of Photovoltaic Systems, International Energy Agency (IEA) PVPS Task 12, Report T12-1
R&D	Commodity	Research and development services (73)	GLOBAL	Update	Meuro	5.00695e-07	Woodhouse, Michael. Brittany Smith, Ashwin Ramdas, and Robert Margolis. 2019. Crystalline Silicon Photovoltaic Module Manufacturing Costs and Sustainable Pricing: 1H 2018 Benchmark and Cost Reduction Roadmap. Golden, CO: National Renewable Energy Laborat
Sales, General and Administrative	Commodity	Wholesale trade and commission trade services; except of motor vehicles and motorcycles (51)	GLOBAL	Update	Meuro	2.75382e-06	Woodhouse, Michael. Brittany Smith, Ashwin Ramdas, and Robert Margolis. 2019. Crystalline Silicon Photovoltaic Module Manufacturing Costs and Sustainable Pricing: 1H 2018 Benchmark and Cost Reduction Roadmap. Golden, CO: National Renewable Energy Laborat
Compensation of employees	Factor of production	Compensation of employees	GLOBAL	Update	Meuro	5.4242e-07	Woodhouse, Michael. Brittany Smith, Ashwin Ramdas, and Robert Margolis. 2019. Crystalline Silicon Photovoltaic Module Manufacturing Costs and Sustainable Pricing: 1H 2018 Benchmark and Cost Reduction Roadmap. Golden, CO: National Renewable Energy Laborat
Operating surplus: Consumption of fixed capital	Factor of production	Operating surplus: Consumption of fixed capital	GLOBAL	Update	Meuro	1.80807e-06	Woodhouse, Michael. Brittany Smith, Ashwin Ramdas, and Robert Margolis. 2019. Crystalline Silicon Photovoltaic Module Manufacturing Costs and Sustainable Pricing: 1H 2018 Benchmark and Cost Reduction Roadmap. Golden, CO: National Renewable Energy Laborat
Taxes, subsidies and net surplus	Factor of production	Taxes, subsidies and net surplus	GLOBAL	Update	Meuro	3.97775e-06	Woodhouse, Michael. Brittany Smith, Ashwin Ramdas, and Robert Margolis. 2019. Crystalline Silicon Photovoltaic Module Manufacturing Costs and Sustainable Pricing: 1H 2018 Benchmark and Cost Reduction Roadmap. Golden, CO: National Renewable Energy Laborat
Employment	Satellite account	Employment	GLOBAL	Update	1000 persons	1.95e-07	Woodhouse, Michael. Brittany Smith, Ashwin Ramdas, and Robert Margolis. 2019. Crystalline Silicon Photovoltaic Module Manufacturing Costs and Sustainable Pricing: 1H 2018 Benchmark and Cost Reduction Roadmap. Golden, CO: National Renewable Energy Laborat
NMVOC, non-methane volatile organic compounds, unspecified origin	Satellite account	NMVOC	GLOBAL	Update	kg	0.0080625	R. Frischknecht, P. Stolz, L. Krebs, M. de Wild-Scholten, P. Sinha, V. Fthenakis, H. C. Kim, M. Raugei, M. Stucki, 2020, Life Cycle Inventories and Life Cycle Assessment of Photovoltaic Systems, International Energy Agency (IEA) PVPS Task 12, Report T12-1
Carbon dioxide	Satellite account	Carbon dioxide	GLOBAL	Update	kg	0.0218125	R. Frischknecht, P. Stolz, L. Krebs, M. de Wild-Scholten, P. Sinha, V. Fthenakis, H. C. Kim, M. Raugei, M. Stucki, 2020, Life Cycle Inventories and Life Cycle Assessment of Photovoltaic Systems, International Energy Agency (IEA) PVPS Task 12, Report T12-1
CO2	Satellite account	Carbon dioxide	GLOBAL	Update	kg	0.000648375	Estimation through GHG protocol data, emissions related to the combustion of 0,000203488372093023 kg of diesel.
CH4	Satellite account	CH4	GLOBAL	Update	kg	8.75e-08	Estimation through GHG protocol data, emissions related to the combustion of 0,000203488372093023 kg of diesel.
N2O	Satellite account	N2O	GLOBAL	Update	kg	5.25e-09	Estimation through GHG protocol data, emissions related to the combustion of 0,000203488372093023 kg of diesel.

## Sheet: Inventories | PV prod EU
back to ReadMe
Input	Item type	EXIOBASE item	EXIOBASE Region	Change type	Unit	Quantity	Source
photovoltaic cell, single-Si, at plant	Commodity	Cells	GLOBAL	Update	m2	0.935415	R. Frischknecht, P. Stolz, L. Krebs, M. de Wild-Scholten, P. Sinha, V. Fthenakis, H. C. Kim, M. Raugei, M. Stucki, 2020, Life Cycle Inventories and Life Cycle Assessment of Photovoltaic Systems, International Energy Agency (IEA) PVPS Task 12, Report T12-1
aluminium alloy, AlMg3, at plant	Commodity	Aluminium and aluminium products	GLOBAL	Update	kg	2.125	R. Frischknecht, P. Stolz, L. Krebs, M. de Wild-Scholten, P. Sinha, V. Fthenakis, H. C. Kim, M. Raugei, M. Stucki, 2020, Life Cycle Inventories and Life Cycle Assessment of Photovoltaic Systems, International Energy Agency (IEA) PVPS Task 12, Report T12-1
copper, at regional storage	Commodity	Copper products	GLOBAL	Update	kg	0.1025	R. Frischknecht, P. Stolz, L. Krebs, M. de Wild-Scholten, P. Sinha, V. Fthenakis, H. C. Kim, M. Raugei, M. Stucki, 2020, Life Cycle Inventories and Life Cycle Assessment of Photovoltaic Systems, International Energy Agency (IEA) PVPS Task 12, Report T12-1
wire drawing, copper	Commodity	Electrical machinery and apparatus n.e.c. (31)	GLOBAL	Update	kg	0.1025	R. Frischknecht, P. Stolz, L. Krebs, M. de Wild-Scholten, P. Sinha, V. Fthenakis, H. C. Kim, M. Raugei, M. Stucki, 2020, Life Cycle Inventories and Life Cycle Assessment of Photovoltaic Systems, International Energy Agency (IEA) PVPS Task 12, Report T12-1
diode, unspecified, at plant	Commodity	Electrical machinery and apparatus n.e.c. (31)	GLOBAL	Update	kg	0.0028125	R. Frischknecht, P. Stolz, L. Krebs, M. de Wild-Scholten, P. Sinha, V. Fthenakis, H. C. Kim, M. Raugei, M. Stucki, 2020, Life Cycle Inventories and Life Cycle Assessment of Photovoltaic Systems, International Energy Agency (IEA) PVPS Task 12, Report T12-1
silicone product, at plant	Commodity	Plastics; basic	GLOBAL	Update	kg	0.121875	R. Frischknecht, P. Stolz, L. Krebs, M. de Wild-Scholten, P. Sinha, V. Fthenakis, H. C. Kim, M. Raugei, M. Stucki, 2020, Life Cycle Inventories and Life Cycle Assessment of Photovoltaic Systems, International Energy Agency (IEA) PVPS Task 12, Report T12-1
tin, at regional storage	Commodity	Lead; zinc and tin and products thereof	GLOBAL	Update	kg	0.012875	R. Frischknecht, P. Stolz, L. Krebs, M. de Wild-Scholten, P. Sinha, V. Fthenakis, H. C. Kim, M. Raugei, M. Stucki, 2020, Life Cycle Inventories and Life Cycle Assessment of Photovoltaic Systems, International Energy Agency (IEA) PVPS Task 12, Report T12-1
lead, at regional storage	Commodity	Lead; zinc and tin and products thereof	GLOBAL	Update	kg	0.000725	R. Frischknecht, P. Stolz, L. Krebs, M. de Wild-Scholten, P. Sinha, V. Fthenakis, H. C. Kim, M. Raugei, M. Stucki, 2020, Life Cycle Inventories and Life Cycle Assessment of Photovoltaic Systems, International Energy Agency (IEA) PVPS Task 12, Report T12-1
solar glass, low-iron, at regional storage	Commodity	Glass and glass products	GLOBAL	Update	kg	8.8125	R. Frischknecht, P. Stolz, L. Krebs, M. de Wild-Scholten, P. Sinha, V. Fthenakis, H. C. Kim, M. Raugei, M. Stucki, 2020, Life Cycle Inventories and Life Cycle Assessment of Photovoltaic Systems, International Energy Agency (IEA) PVPS Task 12, Report T12-1
tempering, flat glass	Commodity	Glass and glass products	GLOBAL	Update	kg	8.8125	R. Frischknecht, P. Stolz, L. Krebs, M. de Wild-Scholten, P. Sinha, V. Fthenakis, H. C. Kim, M. Raugei, M. Stucki, 2020, Life Cycle Inventories and Life Cycle Assessment of Photovoltaic Systems, International Energy Agency (IEA) PVPS Task 12, Report T12-1
glass fibre reinforced plastic, polyamide, injection moulding, at plant	Commodity	Plastics; basic	GLOBAL	Update	kg	0.295	R. Frischknecht, P. Stolz, L. Krebs, M. de Wild-Scholten, P. Sinha, V. Fthenakis, H. C. Kim, M. Raugei, M. Stucki, 2020, Life Cycle Inventories and Life Cycle Assessment of Photovoltaic Systems, International Energy Agency (IEA) PVPS Task 12, Report T12-1
polyethylene terephthalate, granulate, amorphous, at plant	Commodity	Plastics; basic	GLOBAL	Update	kg	0.345625	R. Frischknecht, P. Stolz, L. Krebs, M. de Wild-Scholten, P. Sinha, V. Fthenakis, H. C. Kim, M. Raugei, M. Stucki, 2020, Life Cycle Inventories and Life Cycle Assessment of Photovoltaic Systems, International Energy Agency (IEA) PVPS Task 12, Report T12-1
polyethylene, HDPE, granulate, at plant	Commodity	Plastics; basic	GLOBAL	Update	kg	0.02375	R. Frischknecht, P. Stolz, L. Krebs, M. de Wild-Scholten, P. Sinha, V. Fthenakis, H. C. Kim, M. Raugei, M. Stucki, 2020, Life Cycle Inventories and Life Cycle Assessment of Photovoltaic Systems, International Energy Agency (IEA) PVPS Task 12, Report T12-1
ethylvinylacetate, foil, at plant	Commodity	Plastics; basic	GLOBAL	Update	kg	0.875	R. Frischknecht, P. Stolz, L. Krebs, M. de Wild-Scholten, P. Sinha, V. Fthenakis, H. C. Kim, M. Raugei, M. Stucki, 2020, Life Cycle Inventories and Life Cycle Assessment of Photovoltaic Systems, International Energy Agency (IEA) PVPS Task 12, Report T12-1
polyvinylfluoride film, at plant	Commodity	Polyvinylfluoride film	GLOBAL	Update	kg	0.111875	R. Frischknecht, P. Stolz, L. Krebs, M. de Wild-Scholten, P. Sinha, V. Fthenakis, H. C. Kim, M. Raugei, M. Stucki, 2020, Life Cycle Inventories and Life Cycle Assessment of Photovoltaic Systems, International Energy Agency (IEA) PVPS Task 12, Report T12-1
tap water, water balance according to MoeK 2013, at user	Commodity	Collected and purified water; distribution services of water (41)	GLOBAL	Update	Meuro	1.16626e-08	R. Frischknecht, P. Stolz, L. Krebs, M. de Wild-Scholten, P. Sinha, V. Fthenakis, H. C. Kim, M. Raugei, M. Stucki, 2020, Life Cycle Inventories and Life Cycle Assessment of Photovoltaic Systems, International Energy Agency (IEA) PVPS Task 12, Report T12-1
hydrogen fluoride, at plant	Commodity	Hydrogen fluoride	GLOBAL	Update	kg	0.062375	R. Frischknecht, P. Stolz, L. Krebs, M. de Wild-Scholten, P. Sinha, V. Fthenakis, H. C. Kim, M. Raugei, M. Stucki, 2020, Life Cycle Inventories and Life Cycle Assessment of Photovoltaic Systems, International Energy Agency (IEA) PVPS Task 12, Report T12-1
1-propanol, at plant	Commodity	Chemicals nec	GLOBAL	Update	kg	0.015875	R. Frischknecht, P. Stolz, L. Krebs, M. de Wild-Scholten, P. Sinha, V. Fthenakis, H. C. Kim, M. Raugei, M. Stucki, 2020, Life Cycle Inventories and Life Cycle Assessment of Photovoltaic Systems, International Energy Agency (IEA) PVPS Task 12, Report T12-1
isopropanol, at plant	Commodity	Chemicals nec	GLOBAL	Update	kg	0.000146875	R. Frischknecht, P. Stolz, L. Krebs, M. de Wild-Scholten, P. Sinha, V. Fthenakis, H. C. Kim, M. Raugei, M. Stucki, 2020, Life Cycle Inventories and Life Cycle Assessment of Photovoltaic Systems, International Energy Agency (IEA) PVPS Task 12, Report T12-1
potassium hydroxide, at regional storage	Commodity	Chemicals nec	GLOBAL	Update	kg	0.0514375	R. Frischknecht, P. Stolz, L. Krebs, M. de Wild-Scholten, P. Sinha, V. Fthenakis, H. C. Kim, M. Raugei, M. Stucki, 2020, Life Cycle Inventories and Life Cycle Assessment of Photovoltaic Systems, International Energy Agency (IEA) PVPS Task 12, Report T12-1
soap, at plant	Commodity	Chemicals nec	GLOBAL	Update	kg	0.0115625	R. Frischknecht, P. Stolz, L. Krebs, M. de Wild-Scholten, P. Sinha, V. Fthenakis, H. C. Kim, M. Raugei, M. Stucki, 2020, Life Cycle Inventories and Life Cycle Assessment of Photovoltaic Systems, International Energy Agency (IEA) PVPS Task 12, Report T12-1
corrugated board, mixed fibre, single wall, at plant	Commodity	Paper and paper products	GLOBAL	Update	kg	0.7625	R. Frischknecht, P. Stolz, L. Krebs, M. de Wild-Scholten, P. Sinha, V. Fthenakis, H. C. Kim, M. Raugei, M. Stucki, 2020, Life Cycle Inventories and Life Cycle Assessment of Photovoltaic Systems, International Energy Agency (IEA) PVPS Task 12, Report T12-1
EUR-flat pallet	Commodity	Wood and products of wood and cork (except furniture); articles of straw and plaiting materials (20)	GLOBAL	Update	kg	1.25	R. Frischknecht, P. Stolz, L. Krebs, M. de Wild-Scholten, P. Sinha, V. Fthenakis, H. C. Kim, M. Raugei, M. Stucki, 2020, Life Cycle Inventories and Life Cycle Assessment of Photovoltaic Systems, International Energy Agency (IEA) PVPS Task 12, Report T12-1
electricity, medium voltage, at grid	Commodity	Electricity	GLOBAL	Update	kWh	13.9754	R. Frischknecht, P. Stolz, L. Krebs, M. de Wild-Scholten, P. Sinha, V. Fthenakis, H. C. Kim, M. Raugei, M. Stucki, 2020, Life Cycle Inventories and Life Cycle Assessment of Photovoltaic Systems, International Energy Agency (IEA) PVPS Task 12, Report T12-1
diesel, burned in building machine, average	Commodity	Gas/Diesel Oil	GLOBAL	Update	kg	0.000203488	R. Frischknecht, P. Stolz, L. Krebs, M. de Wild-Scholten, P. Sinha, V. Fthenakis, H. C. Kim, M. Raugei, M. Stucki, 2020, Life Cycle Inventories and Life Cycle Assessment of Photovoltaic Systems, International Energy Agency (IEA) PVPS Task 12, Report T12-1
transport, transoceanic freight ship	Commodity	Sea and coastal water transportation services	GLOBAL	Update	Meuro	1.6739e-06	Estimation through UN ComTrade data
transport, freight, lorry, fleet average	Commodity	Other land transportation services	GLOBAL	Update	Meuro	2.81941e-06	Estimation through UN ComTrade data
transport, freight, rail	Commodity	Railway transportation services	GLOBAL	Update	Meuro	2.86716e-07	Estimation through UN ComTrade data
disposal, municipal solid waste, 22.9% water, to municipal incineration	Commodity	Intert/metal waste for treatment: incineration	GLOBAL	Update	tonnes (service)	3e-05	R. Frischknecht, P. Stolz, L. Krebs, M. de Wild-Scholten, P. Sinha, V. Fthenakis, H. C. Kim, M. Raugei, M. Stucki, 2020, Life Cycle Inventories and Life Cycle Assessment of Photovoltaic Systems, International Energy Agency (IEA) PVPS Task 12, Report T12-1
disposal, polyvinylfluoride, 0.2% water, to municipal incineration	Commodity	Intert/metal waste for treatment: incineration	GLOBAL	Update	tonnes (service)	4.29375e-06	R. Frischknecht, P. Stolz, L. Krebs, M. de Wild-Scholten, P. Sinha, V. Fthenakis, H. C. Kim, M. Raugei, M. Stucki, 2020, Life Cycle Inventories and Life Cycle Assessment of Photovoltaic Systems, International Energy Agency (IEA) PVPS Task 12, Report T12-1
disposal, plastics, mixture, 15.3% water, to municipal incineration	Commodity	Plastic waste for treatment: incineration	GLOBAL	Update	tonnes (service)	2.80625e-05	R. Frischknecht, P. Stolz, L. Krebs, M. de Wild-Scholten, P. Sinha, V. Fthenakis, H. C. Kim, M. Raugei, M. Stucki, 2020, Life Cycle Inventories and Life Cycle Assessment of Photovoltaic Systems, International Energy Agency (IEA) PVPS Task 12, Report T12-1
disposal, used mineral oil, 10% water, to hazardous waste incineration	Commodity	Oil/hazardous waste for treatment: incineration	GLOBAL	Update	tonnes (service)	1.60625e-06	R. Frischknecht, P. Stolz, L. Krebs, M. de Wild-Scholten, P. Sinha, V. Fthenakis, H. C. Kim, M. Raugei, M. Stucki, 2020, Life Cycle Inventories and Life Cycle Assessment of Photovoltaic Systems, International Energy Agency (IEA) PVPS Task 12, Report T12-1
R&D	Commodity	Research and development services (73)	GLOBAL	Update	Meuro	5.00695e-07	Woodhouse, Michael. Brittany Smith, Ashwin Ramdas, and Robert Margolis. 2019. Crystalline Silicon Photovoltaic Module Manufacturing Costs and Sustainable Pricing: 1H 2018 Benchmark and Cost Reduction Roadmap. Golden, CO: National Renewable Energy Laborat
Sales, General and Administrative	Commodity	Wholesale trade and commission trade services; except of motor vehicles and motorcycles (51)	GLOBAL	Update	Meuro	2.75382e-06	Woodhouse, Michael. Brittany Smith, Ashwin Ramdas, and Robert Margolis. 2019. Crystalline Silicon Photovoltaic Module Manufacturing Costs and Sustainable Pricing: 1H 2018 Benchmark and Cost Reduction Roadmap. Golden, CO: National Renewable Energy Laborat
Compensation of employees	Factor of production	Compensation of employees	GLOBAL	Update	Meuro	5.4242e-07	Woodhouse, Michael. Brittany Smith, Ashwin Ramdas, and Robert Margolis. 2019. Crystalline Silicon Photovoltaic Module Manufacturing Costs and Sustainable Pricing: 1H 2018 Benchmark and Cost Reduction Roadmap. Golden, CO: National Renewable Energy Laborat
Operating surplus: Consumption of fixed capital	Factor of production	Operating surplus: Consumption of fixed capital	GLOBAL	Update	Meuro	1.80807e-06	Woodhouse, Michael. Brittany Smith, Ashwin Ramdas, and Robert Margolis. 2019. Crystalline Silicon Photovoltaic Module Manufacturing Costs and Sustainable Pricing: 1H 2018 Benchmark and Cost Reduction Roadmap. Golden, CO: National Renewable Energy Laborat
Taxes, subsidies and net surplus	Factor of production	Taxes, subsidies and net surplus	GLOBAL	Update	Meuro	3.97775e-06	Woodhouse, Michael. Brittany Smith, Ashwin Ramdas, and Robert Margolis. 2019. Crystalline Silicon Photovoltaic Module Manufacturing Costs and Sustainable Pricing: 1H 2018 Benchmark and Cost Reduction Roadmap. Golden, CO: National Renewable Energy Laborat
Employment	Satellite account	Employment	GLOBAL	Update	1000 persons	1.95e-07	Woodhouse, Michael. Brittany Smith, Ashwin Ramdas, and Robert Margolis. 2019. Crystalline Silicon Photovoltaic Module Manufacturing Costs and Sustainable Pricing: 1H 2018 Benchmark and Cost Reduction Roadmap. Golden, CO: National Renewable Energy Laborat
NMVOC, non-methane volatile organic compounds, unspecified origin	Satellite account	NMVOC	GLOBAL	Update	kg	0.0080625	R. Frischknecht, P. Stolz, L. Krebs, M. de Wild-Scholten, P. Sinha, V. Fthenakis, H. C. Kim, M. Raugei, M. Stucki, 2020, Life Cycle Inventories and Life Cycle Assessment of Photovoltaic Systems, International Energy Agency (IEA) PVPS Task 12, Report T12-1
Carbon dioxide	Satellite account	Carbon dioxide	GLOBAL	Update	kg	0.0218125	R. Frischknecht, P. Stolz, L. Krebs, M. de Wild-Scholten, P. Sinha, V. Fthenakis, H. C. Kim, M. Raugei, M. Stucki, 2020, Life Cycle Inventories and Life Cycle Assessment of Photovoltaic Systems, International Energy Agency (IEA) PVPS Task 12, Report T12-1
CO2	Satellite account	Carbon dioxide	GLOBAL	Update	kg	0.000648375	Estimation through GHG protocol data, emissions related to the combustion of 0,000203488372093023 kg of diesel.
CH4	Satellite account	CH4	GLOBAL	Update	kg	8.75e-08	Estimation through GHG protocol data, emissions related to the combustion of 0,000203488372093023 kg of diesel.
N2O	Satellite account	N2O	GLOBAL	Update	kg	5.25e-09	Estimation through GHG protocol data, emissions related to the combustion of 0,000203488372093023 kg of diesel.

## Sheet: Inventories | PV prod US
back to ReadMe
Input	Item type	EXIOBASE item	EXIOBASE Region	Change type	Unit	Quantity	Source
photovoltaic cell, single-Si, at plant	Commodity	Cells	GLOBAL	Update	m2	0.935415	R. Frischknecht, P. Stolz, L. Krebs, M. de Wild-Scholten, P. Sinha, V. Fthenakis, H. C. Kim, M. Raugei, M. Stucki, 2020, Life Cycle Inventories and Life Cycle Assessment of Photovoltaic Systems, International Energy Agency (IEA) PVPS Task 12, Report T12-1
aluminium alloy, AlMg3, at plant	Commodity	Aluminium and aluminium products	GLOBAL	Update	kg	2.125	R. Frischknecht, P. Stolz, L. Krebs, M. de Wild-Scholten, P. Sinha, V. Fthenakis, H. C. Kim, M. Raugei, M. Stucki, 2020, Life Cycle Inventories and Life Cycle Assessment of Photovoltaic Systems, International Energy Agency (IEA) PVPS Task 12, Report T12-1
copper, at regional storage	Commodity	Copper products	GLOBAL	Update	kg	0.1025	R. Frischknecht, P. Stolz, L. Krebs, M. de Wild-Scholten, P. Sinha, V. Fthenakis, H. C. Kim, M. Raugei, M. Stucki, 2020, Life Cycle Inventories and Life Cycle Assessment of Photovoltaic Systems, International Energy Agency (IEA) PVPS Task 12, Report T12-1
wire drawing, copper	Commodity	Electrical machinery and apparatus n.e.c. (31)	GLOBAL	Update	kg	0.1025	R. Frischknecht, P. Stolz, L. Krebs, M. de Wild-Scholten, P. Sinha, V. Fthenakis, H. C. Kim, M. Raugei, M. Stucki, 2020, Life Cycle Inventories and Life Cycle Assessment of Photovoltaic Systems, International Energy Agency (IEA) PVPS Task 12, Report T12-1
diode, unspecified, at plant	Commodity	Electrical machinery and apparatus n.e.c. (31)	GLOBAL	Update	kg	0.0028125	R. Frischknecht, P. Stolz, L. Krebs, M. de Wild-Scholten, P. Sinha, V. Fthenakis, H. C. Kim, M. Raugei, M. Stucki, 2020, Life Cycle Inventories and Life Cycle Assessment of Photovoltaic Systems, International Energy Agency (IEA) PVPS Task 12, Report T12-1
silicone product, at plant	Commodity	Plastics; basic	GLOBAL	Update	kg	0.121875	R. Frischknecht, P. Stolz, L. Krebs, M. de Wild-Scholten, P. Sinha, V. Fthenakis, H. C. Kim, M. Raugei, M. Stucki, 2020, Life Cycle Inventories and Life Cycle Assessment of Photovoltaic Systems, International Energy Agency (IEA) PVPS Task 12, Report T12-1
tin, at regional storage	Commodity	Lead; zinc and tin and products thereof	GLOBAL	Update	kg	0.012875	R. Frischknecht, P. Stolz, L. Krebs, M. de Wild-Scholten, P. Sinha, V. Fthenakis, H. C. Kim, M. Raugei, M. Stucki, 2020, Life Cycle Inventories and Life Cycle Assessment of Photovoltaic Systems, International Energy Agency (IEA) PVPS Task 12, Report T12-1
lead, at regional storage	Commodity	Lead; zinc and tin and products thereof	GLOBAL	Update	kg	0.000725	R. Frischknecht, P. Stolz, L. Krebs, M. de Wild-Scholten, P. Sinha, V. Fthenakis, H. C. Kim, M. Raugei, M. Stucki, 2020, Life Cycle Inventories and Life Cycle Assessment of Photovoltaic Systems, International Energy Agency (IEA) PVPS Task 12, Report T12-1
solar glass, low-iron, at regional storage	Commodity	Glass and glass products	GLOBAL	Update	kg	8.8125	R. Frischknecht, P. Stolz, L. Krebs, M. de Wild-Scholten, P. Sinha, V. Fthenakis, H. C. Kim, M. Raugei, M. Stucki, 2020, Life Cycle Inventories and Life Cycle Assessment of Photovoltaic Systems, International Energy Agency (IEA) PVPS Task 12, Report T12-1
tempering, flat glass	Commodity	Glass and glass products	GLOBAL	Update	kg	8.8125	R. Frischknecht, P. Stolz, L. Krebs, M. de Wild-Scholten, P. Sinha, V. Fthenakis, H. C. Kim, M. Raugei, M. Stucki, 2020, Life Cycle Inventories and Life Cycle Assessment of Photovoltaic Systems, International Energy Agency (IEA) PVPS Task 12, Report T12-1
glass fibre reinforced plastic, polyamide, injection moulding, at plant	Commodity	Plastics; basic	GLOBAL	Update	kg	0.295	R. Frischknecht, P. Stolz, L. Krebs, M. de Wild-Scholten, P. Sinha, V. Fthenakis, H. C. Kim, M. Raugei, M. Stucki, 2020, Life Cycle Inventories and Life Cycle Assessment of Photovoltaic Systems, International Energy Agency (IEA) PVPS Task 12, Report T12-1
polyethylene terephthalate, granulate, amorphous, at plant	Commodity	Plastics; basic	GLOBAL	Update	kg	0.345625	R. Frischknecht, P. Stolz, L. Krebs, M. de Wild-Scholten, P. Sinha, V. Fthenakis, H. C. Kim, M. Raugei, M. Stucki, 2020, Life Cycle Inventories and Life Cycle Assessment of Photovoltaic Systems, International Energy Agency (IEA) PVPS Task 12, Report T12-1
polyethylene, HDPE, granulate, at plant	Commodity	Plastics; basic	GLOBAL	Update	kg	0.02375	R. Frischknecht, P. Stolz, L. Krebs, M. de Wild-Scholten, P. Sinha, V. Fthenakis, H. C. Kim, M. Raugei, M. Stucki, 2020, Life Cycle Inventories and Life Cycle Assessment of Photovoltaic Systems, International Energy Agency (IEA) PVPS Task 12, Report T12-1
ethylvinylacetate, foil, at plant	Commodity	Plastics; basic	GLOBAL	Update	kg	0.875	R. Frischknecht, P. Stolz, L. Krebs, M. de Wild-Scholten, P. Sinha, V. Fthenakis, H. C. Kim, M. Raugei, M. Stucki, 2020, Life Cycle Inventories and Life Cycle Assessment of Photovoltaic Systems, International Energy Agency (IEA) PVPS Task 12, Report T12-1
polyvinylfluoride film, at plant	Commodity	Polyvinylfluoride film	GLOBAL	Update	kg	0.111875	R. Frischknecht, P. Stolz, L. Krebs, M. de Wild-Scholten, P. Sinha, V. Fthenakis, H. C. Kim, M. Raugei, M. Stucki, 2020, Life Cycle Inventories and Life Cycle Assessment of Photovoltaic Systems, International Energy Agency (IEA) PVPS Task 12, Report T12-1
tap water, water balance according to MoeK 2013, at user	Commodity	Collected and purified water; distribution services of water (41)	GLOBAL	Update	Meuro	1.16626e-08	R. Frischknecht, P. Stolz, L. Krebs, M. de Wild-Scholten, P. Sinha, V. Fthenakis, H. C. Kim, M. Raugei, M. Stucki, 2020, Life Cycle Inventories and Life Cycle Assessment of Photovoltaic Systems, International Energy Agency (IEA) PVPS Task 12, Report T12-1
hydrogen fluoride, at plant	Commodity	Hydrogen fluoride	GLOBAL	Update	kg	0.062375	R. Frischknecht, P. Stolz, L. Krebs, M. de Wild-Scholten, P. Sinha, V. Fthenakis, H. C. Kim, M. Raugei, M. Stucki, 2020, Life Cycle Inventories and Life Cycle Assessment of Photovoltaic Systems, International Energy Agency (IEA) PVPS Task 12, Report T12-1
1-propanol, at plant	Commodity	Chemicals nec	GLOBAL	Update	kg	0.015875	R. Frischknecht, P. Stolz, L. Krebs, M. de Wild-Scholten, P. Sinha, V. Fthenakis, H. C. Kim, M. Raugei, M. Stucki, 2020, Life Cycle Inventories and Life Cycle Assessment of Photovoltaic Systems, International Energy Agency (IEA) PVPS Task 12, Report T12-1
isopropanol, at plant	Commodity	Chemicals nec	GLOBAL	Update	kg	0.000146875	R. Frischknecht, P. Stolz, L. Krebs, M. de Wild-Scholten, P. Sinha, V. Fthenakis, H. C. Kim, M. Raugei, M. Stucki, 2020, Life Cycle Inventories and Life Cycle Assessment of Photovoltaic Systems, International Energy Agency (IEA) PVPS Task 12, Report T12-1
potassium hydroxide, at regional storage	Commodity	Chemicals nec	GLOBAL	Update	kg	0.0514375	R. Frischknecht, P. Stolz, L. Krebs, M. de Wild-Scholten, P. Sinha, V. Fthenakis, H. C. Kim, M. Raugei, M. Stucki, 2020, Life Cycle Inventories and Life Cycle Assessment of Photovoltaic Systems, International Energy Agency (IEA) PVPS Task 12, Report T12-1
soap, at plant	Commodity	Chemicals nec	GLOBAL	Update	kg	0.0115625	R. Frischknecht, P. Stolz, L. Krebs, M. de Wild-Scholten, P. Sinha, V. Fthenakis, H. C. Kim, M. Raugei, M. Stucki, 2020, Life Cycle Inventories and Life Cycle Assessment of Photovoltaic Systems, International Energy Agency (IEA) PVPS Task 12, Report T12-1
corrugated board, mixed fibre, single wall, at plant	Commodity	Paper and paper products	GLOBAL	Update	kg	0.7625	R. Frischknecht, P. Stolz, L. Krebs, M. de Wild-Scholten, P. Sinha, V. Fthenakis, H. C. Kim, M. Raugei, M. Stucki, 2020, Life Cycle Inventories and Life Cycle Assessment of Photovoltaic Systems, International Energy Agency (IEA) PVPS Task 12, Report T12-1
EUR-flat pallet	Commodity	Wood and products of wood and cork (except furniture); articles of straw and plaiting materials (20)	GLOBAL	Update	kg	1.25	R. Frischknecht, P. Stolz, L. Krebs, M. de Wild-Scholten, P. Sinha, V. Fthenakis, H. C. Kim, M. Raugei, M. Stucki, 2020, Life Cycle Inventories and Life Cycle Assessment of Photovoltaic Systems, International Energy Agency (IEA) PVPS Task 12, Report T12-1
electricity, medium voltage, at grid	Commodity	Electricity	GLOBAL	Update	kWh	13.9754	R. Frischknecht, P. Stolz, L. Krebs, M. de Wild-Scholten, P. Sinha, V. Fthenakis, H. C. Kim, M. Raugei, M. Stucki, 2020, Life Cycle Inventories and Life Cycle Assessment of Photovoltaic Systems, International Energy Agency (IEA) PVPS Task 12, Report T12-1
diesel, burned in building machine, average	Commodity	Gas/Diesel Oil	GLOBAL	Update	kg	0.000203488	R. Frischknecht, P. Stolz, L. Krebs, M. de Wild-Scholten, P. Sinha, V. Fthenakis, H. C. Kim, M. Raugei, M. Stucki, 2020, Life Cycle Inventories and Life Cycle Assessment of Photovoltaic Systems, International Energy Agency (IEA) PVPS Task 12, Report T12-1
transport, transoceanic freight ship	Commodity	Sea and coastal water transportation services	GLOBAL	Update	Meuro	2.26812e-06	Estimation through UN ComTrade data
transport, freight, lorry, fleet average	Commodity	Other land transportation services	GLOBAL	Update	Meuro	2.81941e-06	Estimation through UN ComTrade data
transport, freight, rail	Commodity	Railway transportation services	GLOBAL	Update	Meuro	2.86716e-07	Estimation through UN ComTrade data
disposal, municipal solid waste, 22.9% water, to municipal incineration	Commodity	Intert/metal waste for treatment: incineration	GLOBAL	Update	tonnes (service)	3e-05	R. Frischknecht, P. Stolz, L. Krebs, M. de Wild-Scholten, P. Sinha, V. Fthenakis, H. C. Kim, M. Raugei, M. Stucki, 2020, Life Cycle Inventories and Life Cycle Assessment of Photovoltaic Systems, International Energy Agency (IEA) PVPS Task 12, Report T12-1
disposal, polyvinylfluoride, 0.2% water, to municipal incineration	Commodity	Intert/metal waste for treatment: incineration	GLOBAL	Update	tonnes (service)	4.29375e-06	R. Frischknecht, P. Stolz, L. Krebs, M. de Wild-Scholten, P. Sinha, V. Fthenakis, H. C. Kim, M. Raugei, M. Stucki, 2020, Life Cycle Inventories and Life Cycle Assessment of Photovoltaic Systems, International Energy Agency (IEA) PVPS Task 12, Report T12-1
disposal, plastics, mixture, 15.3% water, to municipal incineration	Commodity	Plastic waste for treatment: incineration	GLOBAL	Update	tonnes (service)	2.80625e-05	R. Frischknecht, P. Stolz, L. Krebs, M. de Wild-Scholten, P. Sinha, V. Fthenakis, H. C. Kim, M. Raugei, M. Stucki, 2020, Life Cycle Inventories and Life Cycle Assessment of Photovoltaic Systems, International Energy Agency (IEA) PVPS Task 12, Report T12-1
disposal, used mineral oil, 10% water, to hazardous waste incineration	Commodity	Oil/hazardous waste for treatment: incineration	GLOBAL	Update	tonnes (service)	1.60625e-06	R. Frischknecht, P. Stolz, L. Krebs, M. de Wild-Scholten, P. Sinha, V. Fthenakis, H. C. Kim, M. Raugei, M. Stucki, 2020, Life Cycle Inventories and Life Cycle Assessment of Photovoltaic Systems, International Energy Agency (IEA) PVPS Task 12, Report T12-1
R&D	Commodity	Research and development services (73)	GLOBAL	Update	Meuro	5.00695e-07	Woodhouse, Michael. Brittany Smith, Ashwin Ramdas, and Robert Margolis. 2019. Crystalline Silicon Photovoltaic Module Manufacturing Costs and Sustainable Pricing: 1H 2018 Benchmark and Cost Reduction Roadmap. Golden, CO: National Renewable Energy Laborat
Sales, General and Administrative	Commodity	Wholesale trade and commission trade services; except of motor vehicles and motorcycles (51)	GLOBAL	Update	Meuro	2.75382e-06	Woodhouse, Michael. Brittany Smith, Ashwin Ramdas, and Robert Margolis. 2019. Crystalline Silicon Photovoltaic Module Manufacturing Costs and Sustainable Pricing: 1H 2018 Benchmark and Cost Reduction Roadmap. Golden, CO: National Renewable Energy Laborat
Compensation of employees	Factor of production	Compensation of employees	GLOBAL	Update	Meuro	5.4242e-07	Woodhouse, Michael. Brittany Smith, Ashwin Ramdas, and Robert Margolis. 2019. Crystalline Silicon Photovoltaic Module Manufacturing Costs and Sustainable Pricing: 1H 2018 Benchmark and Cost Reduction Roadmap. Golden, CO: National Renewable Energy Laborat
Operating surplus: Consumption of fixed capital	Factor of production	Operating surplus: Consumption of fixed capital	GLOBAL	Update	Meuro	1.80807e-06	Woodhouse, Michael. Brittany Smith, Ashwin Ramdas, and Robert Margolis. 2019. Crystalline Silicon Photovoltaic Module Manufacturing Costs and Sustainable Pricing: 1H 2018 Benchmark and Cost Reduction Roadmap. Golden, CO: National Renewable Energy Laborat
Taxes, subsidies and net surplus	Factor of production	Taxes, subsidies and net surplus	GLOBAL	Update	Meuro	3.97775e-06	Woodhouse, Michael. Brittany Smith, Ashwin Ramdas, and Robert Margolis. 2019. Crystalline Silicon Photovoltaic Module Manufacturing Costs and Sustainable Pricing: 1H 2018 Benchmark and Cost Reduction Roadmap. Golden, CO: National Renewable Energy Laborat
Employment	Satellite account	Employment	GLOBAL	Update	1000 persons	1.95e-07	Woodhouse, Michael. Brittany Smith, Ashwin Ramdas, and Robert Margolis. 2019. Crystalline Silicon Photovoltaic Module Manufacturing Costs and Sustainable Pricing: 1H 2018 Benchmark and Cost Reduction Roadmap. Golden, CO: National Renewable Energy Laborat
NMVOC, non-methane volatile organic compounds, unspecified origin	Satellite account	NMVOC	GLOBAL	Update	kg	0.0080625	R. Frischknecht, P. Stolz, L. Krebs, M. de Wild-Scholten, P. Sinha, V. Fthenakis, H. C. Kim, M. Raugei, M. Stucki, 2020, Life Cycle Inventories and Life Cycle Assessment of Photovoltaic Systems, International Energy Agency (IEA) PVPS Task 12, Report T12-1
Carbon dioxide	Satellite account	Carbon dioxide	GLOBAL	Update	kg	0.0218125	R. Frischknecht, P. Stolz, L. Krebs, M. de Wild-Scholten, P. Sinha, V. Fthenakis, H. C. Kim, M. Raugei, M. Stucki, 2020, Life Cycle Inventories and Life Cycle Assessment of Photovoltaic Systems, International Energy Agency (IEA) PVPS Task 12, Report T12-1
CO2	Satellite account	Carbon dioxide	GLOBAL	Update	kg	0.000648375	Estimation through GHG protocol data, emissions related to the combustion of 0,000203488372093023 kg of diesel.
CH4	Satellite account	CH4	GLOBAL	Update	kg	8.75e-08	Estimation through GHG protocol data, emissions related to the combustion of 0,000203488372093023 kg of diesel.
N2O	Satellite account	N2O	GLOBAL	Update	kg	5.25e-09	Estimation through GHG protocol data, emissions related to the combustion of 0,000203488372093023 kg of diesel.

[truncated: 36 more sheets: Inventories | PV prod APAC, Inventories | Cell prod CN, Inventories | Cell prod EU, Inventories | Cell prod US, Inventories | Cell prod APAC, Inventories | Paste, Inventories | Silane, Inventories | Wafer prod CN, Inventories | Wafer prod EU, Inventories | Wafer prod US, Inventories | Wafer prod APAC, Inventories | Ingot prod CN, Inventories | Ingot prod EU, Inventories | Ingot prod US, Inventories | Ingot prod APAC, Inventories | SGS prod CN, Inventories | SGS prod EU, Inventories | SGS prod US, Inventories | SGS prod APAC, Inventories | MGS prod …]
